# Supplementary material for: 1997 Kronotsky earthquake and tsunami and their predecessors, Kamchatka, Russia
Source: Copernicus journal article supplement (doi:10.5194/nhess-2017-172), 2017-06-20
Supplement: Supplementary file [file nhess-2017-172-RC2-supplement.pdf]

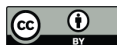

1 **1997 Kronotsky earthquake and tsunami and their predecessors,**  
2 **Kamchatka, Russia**

3 Joanne Bourgeois<sup>1</sup>, Tatiana K. Pinegina<sup>2</sup>

4 <sup>1</sup>Department of Earth and Space Sciences, University of Washington, Seattle, WA 98195-1310, USA

5 <sup>2</sup>Institute of Volcanology and Seismology, FEB RAS, 9 Piip Boulevard, Petropavlovsk-Kamchatsky, 683006, Russia

6 *Correspondence to:* Joanne Bourgeois (jbourgeo@uw.edu)

7 **Abstract.** The northern **segment** of the Kamchatka subduction zone (KSZ) experienced three tsunamigenic  
8 earthquakes in the 20<sup>th</sup> century (Feb 1923, April 1923, Dec 1997), events that help us better understand the behavior  
9 of this segment. Characterizing these historical earthquakes and tsunamis in turn contributes to interpreting the  
10 prehistoric record, which is necessary to evaluate recurrence intervals for such events. A particular focus of this  
11 study is the nature and location of the **5 December 1997 Kronotsky** rupture as elucidated by tsunami runup in  
12 southern Kamchatsky Bay. Some studies have characterized the subduction zone off Kronotsky Peninsula as **less**  
13 **seismogenic**, as indicated by gravity-anomaly analyses, and have placed the 1997 rupture south of the promontory.  
14 However, tsunami runup north of the peninsula, as evidenced by our mapping of tsunami deposits, requires the  
15 rupture to extend farther north. Previously reported runup (1997 tsunami) on Kronotsky Peninsula was no more  
16 than 2-3 m, but our studies indicate tsunami heights for at least 50 km north of the peninsula, ranging from 3.4 to 9.5  
17 m (average 6.1 m), exceeding beach ridge heights of 5.3 to 8.3 m (average 7.1 m). For the two 1923 tsunamis, we  
18 cannot distinguish their deposits in southern Kamchatsky Bay, but they are in sum more extensive than the 1997  
19 deposit. A reevaluation of the April 1923 earthquake (and its tsunami) suggests that its moment magnitude should  
20 be revised upward to Mw ~8. This revision makes the two 1923 events more like a pair, with the 1997 earthquake  
21 filling a gap between them. Deeper in time, the 1700-year prehistoric record of tsunamis in southern Kamchatsky  
22 Bay indicates that during this interval, there were no local events significantly larger than the 20<sup>th</sup> century  
23 earthquakes. Together, the historic and prehistoric record suggests a more northerly location of the 1997 rupture, a  
24 revision of the size of the April 1923 earthquake, and agreement with previous work suggesting the northern KSZ  
25 **ruptures in smaller sections** than the southern KSZ. The latter conclusion requires caution, however, as we continue  
26 to learn that our historic and even pre-historic records of earthquakes and tsunamis is limited, in particular as applied  
27 to hazard analysis. This study is a contribution to our continued efforts to understand tectonic behavior around the  
28 northern Pacific and in subduction zones, in general.

29  
30 **Key words:** Kamchatka, subduction zone, 1997 Kronotsky earthquake, 1997 Kronotsky tsunami, Kamchatsky Bay,  
31 paleotsunami, paleoseismology

32  
33 **[copyright statement]**

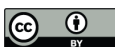

## 34 1 Introduction

35 References to the modest or small tsunamis of 15 December 2006 central Kurils (Ammon et al., 2008; Liu,  
36 2009), when in fact this tsunami generated an average of 9.6 m runup over an along-rupture length of 390 km  
37 (MacInnes et al., 2009), remind us that without post-tsunami or tsunami-deposit surveys, remote spots in the world  
38 may experience large events without a written record. The case of the 5 December 1997 tsunami following the Mw  
39 7.7-7.9 Kronotsky earthquake (Fig. 1, Fig. 2), however, is even more complex historically, because there was a post-  
40 tsunami survey quickly following (Zayakin and Pinegina, 1998), though of limited extent. The local tide-gage record  
41 for this 1997 tsunami is also incomplete, and deep-water pressure recorders deployed at the time were not positioned  
42 to get distinctive recordings from a tsunami originating near Kronotsky Cape (Bourgeois and Titov, 2001). The  
43 earthquake and tsunami occurred in the dark of a December night in an area with no permanent settlements.  
44

45 **Figure 1.** General tectonic setting  
46 and locations. **Upper left:** Major  
47 topography of and bathymetric  
48 features around Kamchatka. **Lower**  
49 **left:** locations of sites mentioned in  
50 text and tables. **Right:** Interpreted  
51 rupture locations of 20<sup>th</sup> century  
52 tsunamigenic (except 1923.II.24)  
53 earthquakes along the Kamchatka  
54 portion of the Kuril-Kamchatka  
55 subduction zone (modified from  
56 Gusev, 2004, Fig. S1; Martin et al.,  
57 2008). The rupture area of the 1997  
58 earthquake varies in different  
59 analyses, one of the subjects of this  
60 (our) paper; also discussed are the  
61 1923 earthquakes. PK =  
62 Petropavlovsk-Kamchatsky; UK =  
63 Ust-Kamchatsk; BI = Bering Island.

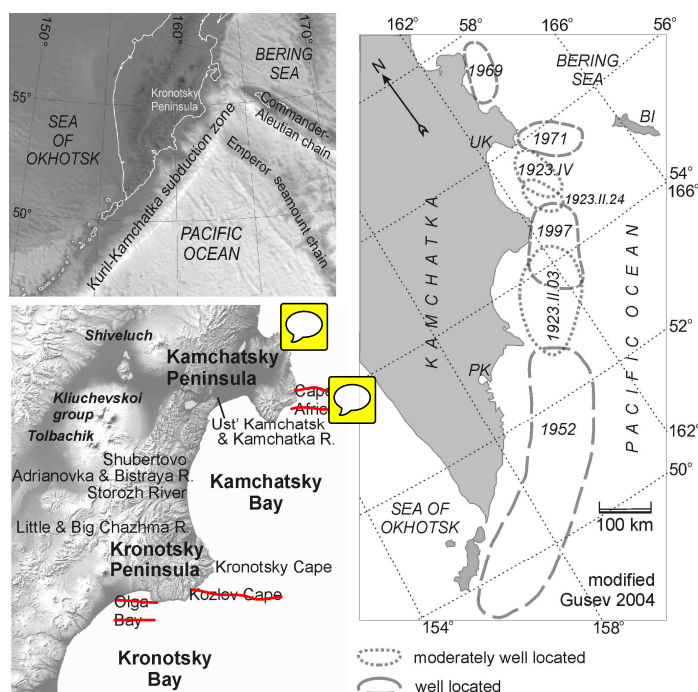

64  
65  
66  
67  
68  
69 In the summer of 2000, we conducted a field survey for historical and paleo- tsunami deposits in south  
70 Kamchatsky Bay (Fig. 1), north of Kronotsky Peninsula. We expected to find evidence of historical Kamchatka  
71 tsunamis such as 1923 (Table 1; Table S1), but not for 1997 Kronotsky because on the southern Kronotsky  
72 Peninsula, the post-tsunami survey found evidence of quite limited runup. Thus we were surprised to find a sand  
73 layer just at the surface, covered only by plant debris such as grass and leaves, distributed much as we have come to  
74 expect of tsunami deposits, and at elevations of 5 m or more above sea level. No alternative other than a tsunami  
75 from the 1997 earthquake and its aftermath could explain the layer and its distribution.

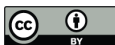

76 The implications of this case, where an earthquake was analyzed without full knowledge its tsunami, are  
77 several. First, the fact that there was runup greater than that reported by a post-tsunami survey changes our view of  
78 the tsunami as well as of the earthquake. Further, the size of the tsunami, based on its deposits and a corroborating  
79 eyewitness account (acquired in 2001), **constrains the rupture characteristics** of this earthquake. The tsunamigenic  
80 portion of this earthquake was in a “gap” between two 1923 tsunamigenic earthquakes, at least one of which was  
81 locally larger than 1997.

82 This recent historical tsunami also helps us interpret earlier historical ~~and~~ well as prehistoric earthquakes  
83 and tsunamis along the northernmost part of the Kuril-Kamchatka subduction zone. Tsunamis originating from this  
84 region commonly have an impact not only locally but also on Hawaii, as did the February 1923 tsunami, and in  
85 some cases even on the western coast of the Americas, as did the 2006 central Kurils tsunami.

86

## 87 **2 Background**

### 88 **2.1 The 1997 Kronotsky earthquake**

89 On 5 December 1997 at 23:26:51 local time (11:26:51 UTC), a large earthquake (Mw 7.7-7.9; we use 7.8)  
90 shook the region of the Kronotsky Peninsula, Kamchatka, Russia (Fig. 1, Fig. 2; Gordeev et al., 1998). The  
91 earthquake was characterized by a typical foreshock-mainshock-aftershock sequence (Gusev et al., 1998; Fedotov et  
92 al., 1998; Balakina, 2000; Zobin and Levina, 2001; Kuzin et al. 2007; Slavina et al., 2007). Most studies of the  
93 earthquake calculate a moment magnitude of 7.8 for the energy released in the first 60-80 seconds of the main  
94 rupture (e.g., Zobin and Levina, 2001). Gusev and Shumilina (2004), in reassessing many Kamchatka earthquakes,  
95 assign Mw 7.9 to Kronotsky 1997. In addition to the mainshock, and using GPS measurements, Gordeev et al.  
96 (2001) calculate Mw 7.7 for deformation in the *pre-seismic* half month, and approximately Mw 7.9 for *post-seismic*  
97 deformation; Bürgmann et al. (2001) calculate Mw 7.7 of (*post-seismic*) aseismic energy release in the 2 months  
98 following the mainshock, also based on GPS data.

99 The locations of the mainshock and of any slip concentration for this earthquake have not been well  
100 resolved, and with one early exception (Sohn, 1998), locators have not used tsunami data. Based on seismic data,  
101 the locations of foreshocks and the mainshock/epicenter (Fig. 2) are in the northern part of the interpreted rupture  
102 area. A number of analytical locations of the mainshock lie under the NE Kronotsky Peninsula (Fig. 2; Table S2).  
103 Some analyses interpret the rupture to have propagated NE to SW (Petukhin et al., 1998), deepening toward the SW.  
104 Gusev (2004) maps the entire aftershock zone as part of the 1997 event (Fig. 1). On the other hand, the linear zone  
105 of aftershocks in the SW (Fig. 2) has been interpreted to be a separate stress zone (Kuzin et al., 2007) potentially  
106 along a separate transverse fault (Slavina et al., 2007). In an analysis focused on GPS data, Bürgmann et al. (2001)  
107 place the majority of the primary rupture energy in the southern half of the aftershock zone.

108

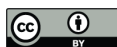

109 **Figure 2.** Foreshocks (3-5 Dec 1997), mainshock  
110 and aftershocks of the 5 December 1997 Kronotsky  
111 earthquake (Gusev et al., 1998). Plotted foreshocks  
112 and MKZ aftershocks include only cases where P and  
113 S arrivals could be read from records of the nearest  
114 station, MKZ. Locations of epicenters and  
115 hypocenters are from various analyses, both local and  
116 farfield as reported from the International  
117 Seismological Center (Table S2). Slavina et al. (2007)  
118 interpret the southwestern aftershock activity to be on  
119 a separate, transverse fault; Kuzin et al. (2007) also  
120 interpret the SW portion of the (extended) aftershock  
121 region to be a separate stress zone  
122

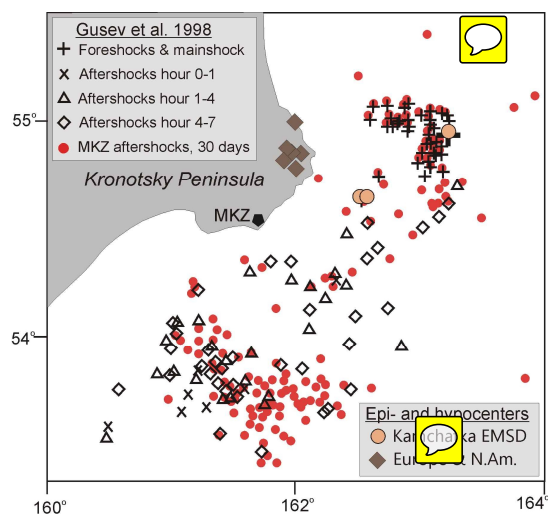

## 126 2.2 The recorded 1997 Kronotsky tsunami

127 The most complete contemporary record of the 1997 Kronotsky tsunami is from far-field tide gages. Both  
128 proximal tide gages, in Ust' Kamchatsk and in Nikolskoe (Bering Island) (Fig. 1), were not functioning when the  
129 tsunami arrived. The Petropavlovsk-Kamchatsky gage is very protected and shows a wave train with an amplitude  
130 of about 0.01 m (Zayakin and Pinegina, 1998). The tide gage at Nikolskoye resumed recording after the first 10  
131 hours of the tsunami, with a few cm of amplitude remaining (Zayakin and Pinegina, 1998). The far-field tsunami  
132 had tide-gage amplitudes in Alaska/Aleutians and Hawaii in line with other tsunamis traveling to Hawaii from the  
133 Russian Far East (Table S3; Fig. S4). The tsunami was recorded on at least 12 tide gages (Table S3), with the  
134 highest amplitude (half of wave height) of 0.3 m at Kahului, Maui, Hawaii. Deep-water pressure sensors deployed  
135 at that time in the north Pacific were all in tsunami shadows for this tsunami source, and in all cases, the modeled  
136 and measured tsunami was within the noise level of the buoys (Bourgeois and Titov, 2001; no event page at  
137 [http://nctr.pmel.noaa.gov/database\\_devel.html](http://nctr.pmel.noaa.gov/database_devel.html)).

138 A truncated post-earthquake and tsunami survey by helicopter took place on 9 December 1997 (Leonov,  
139 1998; Zayakin and Pinegina, 1998). The survey reached as far north as Kronotsky Cape on the Kronotsky Peninsula  
140 (Fig. 1) and found that the tsunami had not exceeded the unvegetated beach. At this time, the beach was covered  
141 with a thin layer of ice and snow, which in places had been coated by the tsunami with a thin sand layer and  
142 elsewhere had been broken up by the tsunami (Fig. 3). The team did not have surveying equipment and estimated  
143 runup to be no more than 3 m (T. Pinegina notes), and the published report gave a maximum of 1-1.5 m. The  
144 turnaround point in the survey was dictated by fuel and available daylight.

145 On 5 December 1997, two rangers were in a cabin near Big Chazhma River; one of them was interviewed  
146 (in Petropavlovsk-Kamchatsky) by T. Pinegina 19 April 2001. They felt the earthquake that night, and the next day,  
147 as was their custom, they went via snowmobile to survey the northern coastal part of Kronotsky reserve, to the Little  
148 Chazhma River area. At the mouth of the Big Chazhma, they saw jumbled ice and seaweed on the snow; a cabin on



149 the south bank of the Little Chazhma River was partly wetted, and there was seaweed on the snow. Normally the  
150 rangers crossed the river near this cabin, but the river was a jumble of ice and they had to go some distance upstream  
151 in order to cross (on ice). On the other side, they could not continue north because there was water in the low spot  
152 between beach and hill (see Fig. 4, our profile 100).

153 Based on results of the post-tsunami survey (reported to Sohn by V. Gusiakov), Sohn (1998) analyzed the  
154 tsunami with regard to its earthquake source and concluded that the main rupture must have lain largely under land,  
155 in order to explain the low runup accompanying a moment magnitude she calculated as  $M_w 7.7$ . However, the  
156 tsunami amplitudes on tide gages in Hawaii indicate that there was substantial subsea deformation.  
157

159 **Figure 3.** Photos taken by T. Pinagina on 9  
161 Dec 1997 near Kronotsky Cape (location on  
163 Fig. 1). For additional photo and sketch for  
165 context, see Fig. S3. **Above:** the tsunami  
167 deposited sand on above the snow up to about  
169 the line of grassy vegetation at the back of the  
171 beach (helicopter for scale). **Lower left:** Ice  
173 and snow broken up by the tsunami (excerpted  
175 from photo in Fig. S3). **Lower right:** detail of  
177 tsunami-deposited sand above snow that  
179 covered the beach. Compass for scale.

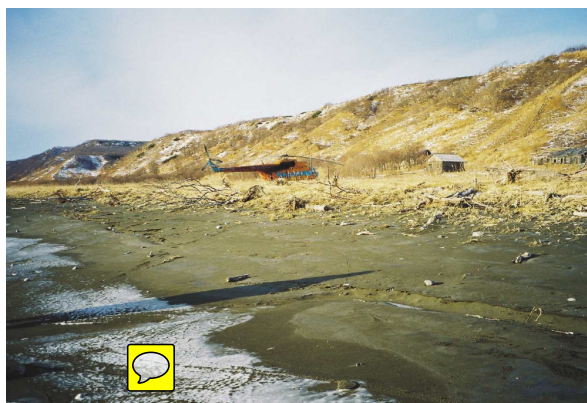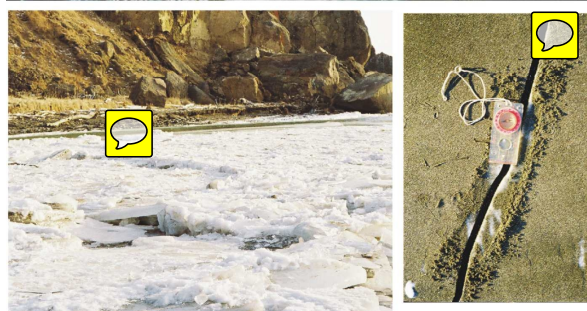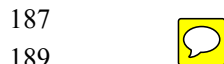

### 201 2.3 Historical record of earthquakes and tsunamis affecting the field area

202 The Kamchatka Peninsula has a short but rich historic record of large earthquakes and attendant tsunamis,  
203 of which we discuss herein only 20<sup>th</sup> century tsunamis originating in or having been recorded in the field region of  
204 southern Kamchatsky Bay (Table 1). In addition to locally originating tsunamis, Kamchatka is vulnerable to  
205 tsunamis originating from Chile, less so from Peru, and not so much from Japan, Alaska, Aleutians and Central  
206 America, due to directivity (e.g., see Table S1). ~~Based on existing scant records in the vicinity of the field area~~  
207 ~~(Table 1), we can expect the 1960 Chile tsunami to have reached elevations of 3–5 m above sea level in the field area,~~  
208 on the order of twice as high as the 1952 southern Kamchatka tsunami *at these same localities*.



Table 1. 20th CENTURY TSUNAMIS AFFECTING THE KAMCHATSKIY BAY COAST OF KAMCHATKA\*

| EARTHQUAKE PARAMETERS |                      |                      | RECORDS OF TSUNAMI RUNUP ( <i>tide gage records in italics</i> ) in meters |               |                           |                    |                        |                       |                          |                    |                      |                 |                       |             |      |
|-----------------------|----------------------|----------------------|----------------------------------------------------------------------------|---------------|---------------------------|--------------------|------------------------|-----------------------|--------------------------|--------------------|----------------------|-----------------|-----------------------|-------------|------|
| Date<br>(local)       | Source region        | Mw                   | Locations South to North (see Figure 1)                                    |               |                           |                    |                        |                       |                          |                    |                      |                 | MAX<br>KAM            | Hilo,<br>HI |      |
|                       |                      |                      | Kron<br>Bay                                                                | Kron.<br>Cape | Chazhma -<br>Adr-Bistr R. | Shuber-<br>R. tovo | 1st River<br>s. of U-K | Tsutsumi<br>s. of U-K | <i>U-K tide<br/>gage</i> | Dembi<br>Spit, U-K | Bering I.<br>(south) |                 |                       |             |      |
| 5-Dec-97              | Kronotskiy Peninsula | 7.8/7.9 <sup>^</sup> | 0.5-1                                                                      | 1.5           | this paper                |                    |                        |                       |                          |                    | <i>gage broken</i>   |                 | <i>incompl record</i> | this paper  | 0.24 |
| 15-Dec-71             | Commander Is.        | 7.8 <sup>^</sup>     |                                                                            |               |                           |                    |                        |                       |                          |                    | 0.47                 |                 |                       |             | 0.10 |
| 23-Nov-69             | Bering Sea           | 7.7                  |                                                                            |               |                           |                    |                        |                       |                          |                    | 0.2                  |                 |                       | 10-15       | 0.10 |
| 24-May-60             | Chile                | 9.5                  | 4                                                                          |               |                           |                    | 3                      |                       |                          | 0.8                | 3-4                  | 3-3.5           |                       | 7           | ~10  |
| 05-Nov-52             | s. Kamchatka         | 9                    | 10-13                                                                      |               |                           | 0.5-1              |                        |                       |                          | 0.1                |                      |                 | 2                     | 10-15       | 1.1  |
| 14-Apr-23             | Kamchatskiy Bay      | 7.3/8.2 <sup>^</sup> |                                                                            |               |                           |                    | 20                     |                       |                          | >5                 |                      | 11 <sup>#</sup> | 4                     | 20          | 0.30 |
| 04-Feb-23             | Kronotskiy Bay       | 8.5 <sup>^</sup>     | 6-8                                                                        |               | 4-5 km up<br>Chazhma      |                    |                        |                       |                          | ~4                 |                      |                 |                       | 6-8         | 6.10 |

\***Bold: tsunamis most likely to leave a sedimentary record in south Kamchatskiy Bay;** see Supplemental Table 1 for a more complete list of tsunamis and Supplemental Table 4 for specifics in 1923 cases. Primary sources: Zayakin and Luchinina, 1987; NCEI (formerly NGDC) Natural Hazards Data, online (see references)

<sup>^</sup>Kamchatka Mw's from Gusev and Shumilina, 2004; G&S 8.2 for 14Apr23 is based on tsunami; see text discussion  
<sup>#</sup>The 20-m and 11-m numbers are from higher-relief shorelines than the other measurements

209  
210

211 The largest documented local tsunamis from earthquakes near Kronotskiy Peninsula (Fig. 1; Table 1) are  
 212 two from 1923, both having local as well as farfield records (Table S4); both may have been large in south  
 213 Kamchatskiy Bay. There was also a 24 Feb 1923 Mw 7.6 earthquake in this area (Fig. 1; Gusev, 2004); however, it  
 214 has no historical tsunami record in the near or far field. [The Mw 8.0 1917 earthquake along the Bering fracture  
 215 zone (Fig. S1) also did not produce an observed tsunami.] The 3 Feb 1923 Kronotskiy Bay earthquake (Mw 8.5) was  
 216 located south of Kronotskiy Cape (Fig. 1). The 14 April 1923 north Kamchatskiy Bay earthquake (Mw 7.3 in NCEI  
 217 catalogue) generated a high tsunami near Ust-Kamchatsk (Table 1; Table S1). Based on tsunami amplitudes, Gusev  
 218 and Shumilina (2004) suggested this April 1923 earthquake had a moment magnitude of 8.2 (Table S1, Fig. S2).  
 219 Based on the estimated locations of the February and April sources (Fig. 1) and the recorded tsunami runup in Ust-  
 220 Kamchatsk (Table 1), we might reason that in south Kamchatskiy Bay the April 1923 tsunami may have been larger.  
 221 However, Zayakin and Luchinina's catalogue records that the February 1923 tsunami went 4-5 km up the Chazhma  
 222 River (Table 1).

223  
224  
225  
226  
227  
228  
229  
230  
231

The record of earthquakes and tsunamis on Kamchatka prior to the 20<sup>th</sup> century is spotty but improving  
 (Zayakin and Luchinina, 1987; Godzikovskaya, 2010); the earthquake catalogue from the second half of the 19<sup>th</sup>  
 century is not as complete as from before or after (Gusev and Shumilina, 2004).  
 Earthquakes on 17 May 1841 and 17 October 1737 originated in the region of the 1952 south Kamchatka great  
 earthquake, so likely did not have significant effect in southern Kamchatskiy Bay (see Table 1, 1952 runup). Other  
 tsunamis that may have affected south Kamchatskiy Bay are an autumn 1849 tsunamigenic earthquake in the vicinity  
 of the Komandorskiy Islands (Godzikovskaya, 2010) and a 1791 event which has an intriguing account of having  
 affected the mouth of the Kamchatka River (Ust-Kamchatsk), reaching 7 km upstream (Zayakina and Luchinina,  
 1987).



232 **3 Methods**

233 We measured 15 topographic profiles (Fig. 4) perpendicular to the shoreline along the coast of southern  
 234 Kamchatsky Bay (Fig. 1), and made 117 excavations along these profiles in order to document historical and  
 235 paleotsunami deposits. We used a surveying rod with a transit level (hand level and tape for profile 001 and upper  
 236 part of profile 120) (methods as in Bourgeois et al., 2006).  
 237

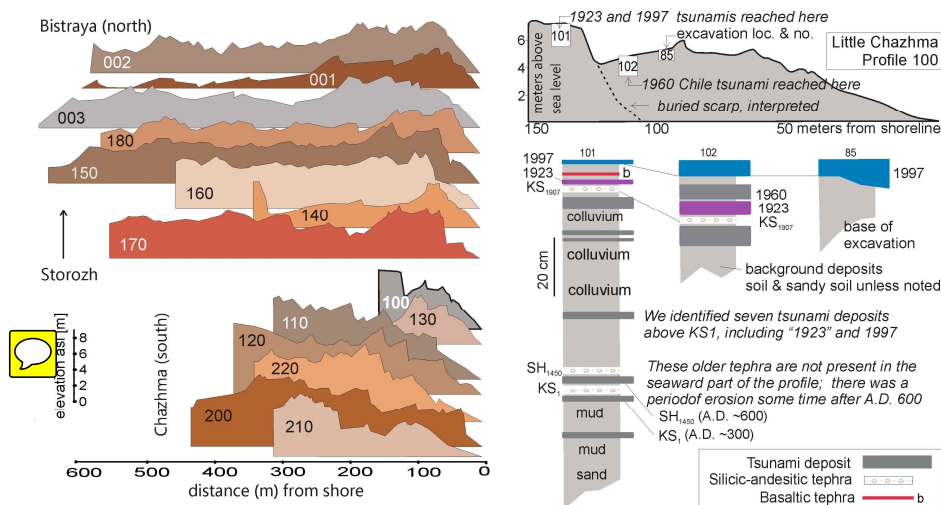

238 **Figure 4.** Left. Topographic profiles measured in southern Kamchatskiy Bay (locations on Fig. 1, arranged from  
 239 south (bottom) to north (top), except 001 and 002 reversed to reveal topography. Distances and elevations are  
 240 measured from 0 at the water line, corrected to low tide. Right. Chazhma Profile 100 used as a key to collected  
 241 profile data and interpretations (*interpretation in italics*); background deposits are soil or sandy soil, unless noted.  
 242  
 243

244 Tsunamis create sedimentary deposits as they flood the coast with turbulent, turbid water. The general  
 245 characterization of a tsunami deposit in sandy coastal systems is a sand sheet that typically thins and fines landward,  
 246 following topography (Bourgeois, 2009). Many factors, from sediment availability to coastal topography and  
 247 roughness to the velocity profile of incoming and outgoing waves, play a role in sedimentation. Kamchatka field  
 248 sites are primarily sandy, vegetated coastal plains and associated peat marshes, where availability of sand and the  
 249 vegetative cover maximize the likelihood of generating and preserving tsunami deposits. (Many historical  
 250 Kamchatka tsunamis have occurred during winter snow cover; deposits would have been “let down” onto a  
 251 vegetative mat as the snow melted.) The maximum distance inland of a tsunami deposit (*sediment inundation*, Fig.  
 252 5) and the deposit’s elevation at sediment inundation (*sediment runoff*, Fig. 5) represent minimum estimates of  
 253 tsunami extent for several reasons. Tsunami deposits can only be more limited (not more extensive) than water  
 254 runoff and inundation, the final limit of a deposit is not always located in the field, and thin deposits may not be  
 255 identified or preserved.

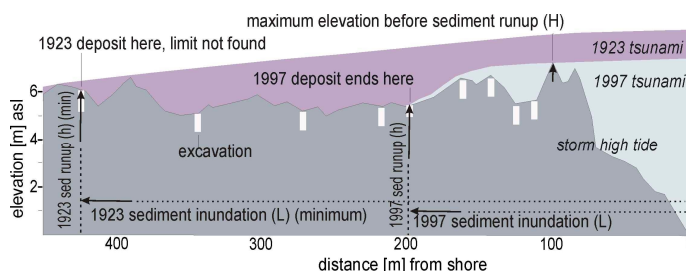

256  
 257 **Figure 5.** Terminology for sediment runoff and sediment inundation, and interpretation of deposits from 1997 and  
 258 1923, using example of an actual profile (Storozh 160; vertical exaggeration ~10). Note that near the shoreline, both  
 259 tsunamis had to exceed a point (H) higher than “sediment runoff” (h) and that, although the minimum sediment  
 260 runoff for 1923 is not much greater than for 1997, 1923 had to have been higher to generate greater inundation.  
 261 Distances and elevations are from surveying.  
 262

263 Primary age control in excavations is provided by dated regional and local marker tephra layers (Table 2),  
 264 which in general have been well studied on Kamchatka (e.g., Braitseva et al., 1997), although tephra in the south  
 265 Kamchatsky Bay area had not previously been examined. Based on our own and previous work, as well as on more  
 266 recently published isopach maps (Kyle et al., 2011; Ponomareva et al., 2017), the three most consistently present  
 267 layers in the sections are KSht<sub>3</sub> (A.D. 1907 — we label KS<sub>1907</sub> on diagrams)—most useful for studying the historical  
 268 record, SH<sub>1450</sub> (A.D. ~600) and KS<sub>1</sub> (A.D. ~300), the latter used as the lower boundary for our tsunami statistics. In  
 269 more northern profiles, SH<sub>2</sub> (A.D. ~1130) is commonly present. Recent work around Shiveluch volcano and  
 270 Kamchatsky Peninsula (Fig. 1) has led to redesignation of Shiveluch tephra and to more definitive model ages of  
 271 these tephra (Ponomareva et al., 2017). In addition to the silicic marker tephra (Table 2), there are local basaltic-  
 272 andesitic tephra layers, which can be from Kliuchevskoi, Bezymianny, Tolbachik or Gamchen volcanoes; we used  
 273 these tephra only as local field guides. In the northernmost of our profiles, a historic ash from Bezymianny 1955  
 274 (year before the 1956 paroxysmal eruption) is locally present and a factor in distinguishing the Kamchatka 1952  
 275 from the Chile 1960 tsunami deposits.  
 276

Table 2. Marker tephra layers younger than 2000 years old in shoreline profile sections, southern Kamchatsky Bay\*

| Code<br>Field/Classic <sup>^</sup>                                                                    | Code<br>New <sup>*</sup> | Source<br>volcano | Modeled age*<br>(years B.P.) | Assigned age*<br>(calendar years) | Field description                                               | Field thickness                 |
|-------------------------------------------------------------------------------------------------------|--------------------------|-------------------|------------------------------|-----------------------------------|-----------------------------------------------------------------|---------------------------------|
| KSht <sub>3</sub>  | KSht <sub>3</sub>        | Ksudach           | Historical                   | A.D. 1907                         | Light to medium gray, fine to very fine sand                    | 0.5-2 cm                        |
| SH <sub>2</sub>                                                                                       | SH#6                     | Shiveluch         | 817 +59/-57                  | A.D. 1134                         | White (faint gray, yellow white), fs-vfs, has pumice            | 0.5-1 cm; distinct toward north |
| SH <sub>1450</sub>                                                                                    | SH#12                    | Shiveluch         | 1356 +52/-45                 | A.D. 596                          | Pale yellow, yellow gray, lt gray, vfs-ms, salt & pepper—grainy | 1-2.5 cm; typically 1-2 cm      |
| KS <sub>1</sub>                                                                                       | KS <sub>1</sub>          | Ksudach           | 1651 +54/-61                 | A.D. 298                          | Lt brown, beige, "coffee cream"; thin gray cap; si-vfs          | 1-3 cm; usually not >2 cm       |

\*Ponomareva et al., 2017

<sup>^</sup>Braitseva et al., 1997





278 For the prehistoric record of tsunami runup and inundation, **topographic profiles would not necessarily be**  
279 **the same as in the recent past must be reconstructed** to account for succeeding topographic changes in elevation and  
280 distance along the profile. While we cannot typically reconstruct profiles that have been changed by erosion, we can  
281 reconstruct profile progradation (building seaward), which affects profile width. Our method uses preserved tephra  
282 as discussed, e.g., in Pinegina et al. (2013) and MacInnes et al. (2016). **Changes in elevation** are quantified by  
283 determining the age and elevation of the lowest former soil horizon above marine sand in any excavation (as in  
284 Pinegina et al., 2013).

285

### 286 3.1 Field localities

287 The southern field site (Fig. 1), which we call **“Chazhma,”** is a narrow strip (~400 m wide or less) of  
288 Holocene accumulative coastline along a rugged coast just north of the Kronotsky Peninsula. The two profiles near  
289 river mouths (Chazhma 210 and Chazhma 130; Fig. 4) maintain lower elevations (< 4 m) over much of their  
290 distance, though both reach elevations of more than 6 m above sea level. The other five profiles rise, typically in  
291 sharp steps indicative of Holocene uplift events (e.g., Pinegina et al., 2013), reaching typical maximum levels of 8-  
292 10 m (Fig. 4). Net uplift on these profiles is consistent with longer-term uplift of Pleistocene terraces on the  
293 Kronotsky Peninsula (Melekestsev et al., 1974).

294 The northern field site, which we call “Storozh,” extending north to the Bistraya River (Fig. 1), is a broader  
295 strip (typically 600 m wide) of Holocene accumulative coastal plain associated with active and drowned river  
296 mouths. Two of these profiles (140, 001) drop in elevation behind one or more beach ridges (Fig. 4). The other  
297 seven profiles are typified by a series of beach ridges, of which the seaward ridges are higher, reaching typically 6-7  
298 m, with an average elevation of the profile in the range of 4-6 m (Fig. 4). Such profiles indicate ~~mid-subsidence~~  
299 or no vertical change in the late Holocene.

300

### 301 4 Results -- 20<sup>th</sup> century tsunami deposits

302 In field season A.D. 2000, the sand we interpret to have been deposited by the 1997 Kronotsky tsunami  
303 formed a sheet-like layer at the surface, buried only by grass, leaves and other dead vegetation. The deposit we  
304 interpret to be “1923” (from one or both of two tsunamis in 1923) lies above the marker tephra  $KS_{1907}$  with less soil  
305 thickness between  $KS_{1907}$  and “1923” than between the top of “1923” and the base of the modern turf. Our  
306 interpretation of “1923” as well as a rare sand layer between “1923” and 1997, which we assign to the 1960 Chile  
307 tsunami, is discussed below.

308 Using identified and mapped tsunami deposits, we calculate minimum sediment runup and inundation on  
309 each of the 15 profiles (Table 3, Figure 6), **correcting for tide at the time of survey.** We determine minimum  
310 sediment runup (h) by the presence or absence of distinct 1997 and “1923” deposits on each profile. We distinguish  
311 between profiles where the farthest landward excavation still contains the 1997 or “1923” deposit and ones that do  
312 not. If no deposit is present in one or more excavations landward of ones with a deposit, the limit of sediment  
313 inundation (L) occurs within the measured profile (Fig. 5, example of 1997) and actual tsunami runup is estimated  
314 from sediment runup. For profiles where a particular tsunami deposit extends beyond all excavations (Fig. 5,



315 example of 1923), the actual size of the tsunami could be, in some cases, significantly greater than our sediment-  
316 runup and inundation minima. We also report the maximum height the tsunami had to exceed (H) as it traveled  
317 along (across) a profile. Note that maximum elevations and inundation distances are affected by elevations and  
318 distances along actual profiles (Fig. 4). In a few cases, the farthest inland excavation was at a low elevation that  
319 could have been reached via the river rather than over the profile (Table 3, Fig. 6).

320

#### 321 4.1 1997 tsunami

322 Sediment runup data (Table 3, Fig. 6) indicate that north of the Kronotsky Peninsula the 1997 Kronotsky tsunami  
323 ran up to as much as 9.5 m, averaging 6.1 m, with moderate inundation distances of 100-300 m. The general pattern  
324 over about 100 km of coastline, including post-tsunami survey observations on Kronotsky Peninsula itself, is  
325 relatively smooth. The maximum elevation reached by the tsunami deposit is higher on southern (Chazhma) profiles.  
326 However, lower runup numbers on northern profiles may be an artifact of their lower elevations (Figure 4);  
327 inundation distances are greater on these profiles (Table 3). On some profiles the 1997 deposit is absent.

328

#### 329 4.2 1923 tsunamis

330 Sediment runup and inundation data for “1923” indicate that this tsunami was larger than 1997. The deposit we  
331 interpret as from 1923 is usually thicker and more extensive, and never less extensive, than the deposit from 1997.  
332 The “1923” deposit is present on all measured profiles whereas the 1997 deposit is missing on six (Table 3, Fig. 6).  
333 Only on profiles where the sediment limit was not found (e.g. 100), or where profiles dropped to low elevations at  
334 their landward extent (001, 180, 160, 140, 100, 130, 210) were “1923” deposits at similar or lower elevations than  
335 1997, and in many of these cases (001, 180, 160, 130), inundation distances for “1923” were longer. Even in the  
336 few cases where our field observations did not distinguish the two by sediment runup or inundation, the “1923”  
337 deposit was coarser and/or thicker than 1997.

338

339 **Figure 6.** Water (Zayakin and Pinegina, 1998) and  
340 sediment runup (this paper, Table 3) for the 1997  
341 Kronotsky tsunami on and north of the Kronotsky  
342 Peninsula, southern Kamchatsky Bay (locations on Figure  
343 1). Water runup was not measured with instruments but  
344 estimated; tsunami did not exceed the unvegetated beach  
345 (e.g., Fig. 3); it could have been somewhat higher than  
346 reported, shown by dashed blue line. Sediment runup is  
347 also illustrated for the tsunami deposit closely above KS<sub>1907</sub>,  
348 which we interpret as from 1923 February or April (see  
349 text discussion). Sediment inundation is given in Table 3,  
350 as well as latitudes and longitudes for the 15 profiles.  
351 Figures 4 and 5 illustrate methods and terminology.  
352

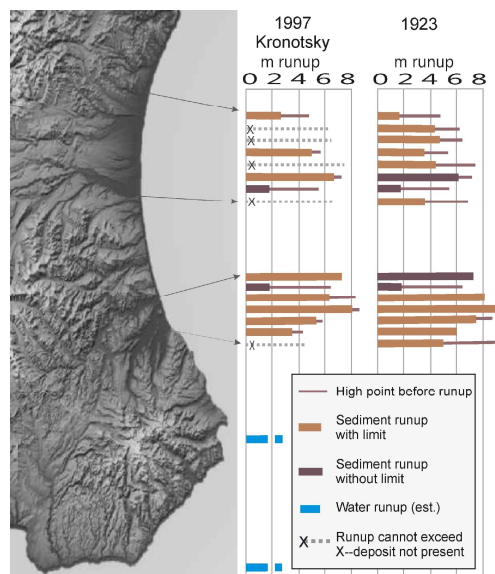



Table 3. Sediment runup and inundation for historical tsunamis above  $KS_{1907}$ , southern Kamchatsky Bay

| Region            | Profile #     | Latitude | Longitude | 1997       |            |            | 1960       |            |            | 1923       |            |            |
|-------------------|---------------|----------|-----------|------------|------------|------------|------------|------------|------------|------------|------------|------------|
|                   |               |          |           | h          | L          | H          | h          | L          | H          | h          | L          | H          |
| Bistraya River    | 001           | 55.6226  | 161.7799  | 3.4        | 200        | 5.3        | 3.3        | <b>126</b> | 5.3        | 2.0        | 250        | 5.3        |
|                   | 001 via river |          |           |            |            |            |            |            |            | 0          | <b>650</b> | *          |
| Bistraya River    | 002           | 55.59735 | 161.76802 |            |            |            |            |            |            | 4.4        | 205        | 6.2        |
|                   | 002 via river |          |           |            |            |            |            |            |            | 2.2        | 560        | *          |
| Bistraya River    | 003           | 55.57814 | 161.76001 |            |            |            |            |            |            | 4.8        | 211        | 6.5        |
| Adrianovka R.     | 180           | 55.52745 | 161.74836 | 4.8        | 118        | 5.6        |            |            |            | 3.5        | 367        | 5.6        |
| Storozh River     | 150           | 55.48508 | 161.74135 |            |            |            |            |            |            | 2          | 645        | 7.7        |
| Storozh River     | 160           | 55.45819 | 161.73936 | 6.6        | 159        | 7.5        | <b>6.2</b> | 107        | 7.5        | 6.1        | 419        | 7.5        |
| Storozh River     | 140           | 55.4387  | 161.7393  | 5.8        | <b>330</b> | 5.8        |            |            |            | 5.8        | 330        | 5.8        |
| Storozh River     | 170           | 55.38604 | 161.73401 |            |            |            |            |            |            | 3.6        | 267        | 6.7        |
| Little Chazhma R. | 100           | 55.1407  | 161.8281  | 7.4        | 125        | 7.4        | 4.5        | 107        | 6.2        | 7.4        | 125        | 7.4        |
| Little Chazhma R. | 130           | 55.1235  | 161.8379  | 4.4        | 109        | 6.3        | 4.4        | 78         | 5.1        | 1.8        | 158        | 6.3        |
| Chazhma           | 110           | 55.1181  | 161.8408  | 6.6        | 200        | 8.3        |            |            |            | 8.1        | 315        | 8.3        |
| Chazhma           | 120           | 55.1019  | 161.8514  | <b>9.5</b> | 200        | 9.5        |            |            |            | <b>12</b>  | 380        | 9.5        |
| Big Chazhma R.    | 220           | 55.0794  | 161.8679  |            |            |            |            |            |            | 7.7        | 335        | 9.8        |
| Big Chazhma R.    | 210           | 55.071   | 161.876   | 6.0        | 305        | 8.0        |            |            |            | 6          | 305        | 8          |
| Big Chazhma R.    | 200           | 55.0629  | 161.8879  |            |            |            |            |            |            | 6.6        | 361        | 9.1        |
|                   | 200 via river |          |           |            |            |            |            |            |            | 5          | 428        | *          |
| <i>AVERAGES</i>   |               |          |           | <i>6.1</i> | <i>194</i> | <i>7.1</i> | <i>4.6</i> | <i>105</i> | <i>6.0</i> | <i>4.9</i> | <i>346</i> | <i>7.3</i> |

h - elevation of excavation **m a.s.l.**; equals "sediment runup" (maxima in bold)

L - distance from the shoreline, m; equals "sediment inundation" (maxima in bold)

H - highest elevation, m a.s.l., between shoreline and excavation; must be exceeded where there is a deposit (max. in bold)

\*If the tsunami reached a low inland point via the river (indeterminate), H from the profile is not relevant.

353  
354

### 355 4.3 Chile1960 deposit

356 Between "1923" and 1997 deposits on a few profiles (Table 3), there is a thin, patchy and less extensive deposit  
 357 which we attribute to the 1960 Chile tsunami (e.g., Fig. 4, right). We favor 1960 over 1952 Kamchatka because the  
 358 1960 tsunami was larger than 1952 in the Kamchatsky Bay region (Table 1). Also, The more locally generated 1952  
 359 tsunami dies off in amplitude along strike of the rupture (MacInnes et al., 2010), whereas the Chilean tsunami on  
 360 Kamchatka is little affected by latitude (Zayakin and Luchinina, 1987). Supporting the 1960 interpretation, in one  
 361 excavation on profile 001, this intermediate tsunami deposit lies above the Bezymianny 1955 tephra layer.

362

### 363 4.4 Historical tsunami deposit close below $KS_{1907}$

364 In many excavations (e.g., Fig. 7), there is a tsunami deposit within a few cm of the base of  $KSht_3$  and which is  
 365 comparable to 1997 and 1923 in thickness and extent. Although pre-1907 sedimentation rates are difficult to  
 366 determine this tsunami deposit must fall within the historical period, which extends back to 1737. However, the  
 367 more complete historical records are from southern Kamchatka, and the second half of the 19<sup>th</sup> century record is  
 368 particularly spotty (Gusev and Shumulina, 2004). Thus we cannot assign a specific event to this deposit.

369



## 370 5 Discussion – 1997 and “1923” Deposits

### 371 5.1 1997 tsunami

372 Our observations are consistent with 1997 being a seismogenic tsunami source with significant rupture energy  
373 expended in the northern portion of the zone of aftershocks. The extensive and relatively smooth distribution of  
374 runup (Table 3; Fig. 6) and the ratio of maximum runup to distance over which the tsunami had significant runup  
375 (on the order of  $10^{-5}$ ) indicate that this tsunami was typical of a seismogenic source rather than a landslide source (cf.  
376 Okal and Synolakis, 2004). The far-field tide-gage records (e.g., Hilo, Table 1) are also indicative of a broad rather  
377 than a point source. Given that the post-tsunami survey reported runup that did not exceed the beach on the  
378 Kronotsky Peninsula and that the deposits we mapped north of the peninsula are from the 1997 tsunami, *any source*  
379 *model must explain low runup on the peninsula and relatively high runup north of the peninsula.* Source region  
380 models by Bürgmann et al. (2001) and Llenos and McGuire (2007), e.g., do not include the northern aftershock area,  
381 and such models have been used to interpret Kamchatka subduction-zone behavior (e.g., Song and Simons, 2003;  
382 Bürgmann et al., 2005; Llenos and McGuire, 2007; Bassett and Watts, 2015). On the other hand, source regions by  
383 Gusev et al. (1998; also Gusev, 2004) and Levina et al. (2013) tend to include the entire aftershock zone,  
384 overlapping Feb 1923 in the south but also filling the gap between Feb 1923 and April 1923 (Fig. S1). Zobin and  
385 Levina (2001) favor most mainshock energy being generated in the middle zone defined by fewer aftershocks (see  
386 Fig. 2); Slavina et al. (2007) interpret the southwestern aftershock activity (Fig. 2) to be on a separate, transverse  
387 fault; Kuzin et al. (2007) also interpret the SW portion of the (extended) aftershock region to be a separate stress  
388 zone. A recently published finite fault model ~~resolves to most deformation~~ being under the Kronotsky Peninsula,  
389 with most energy release focused in the north (Hayes, 2017;  
390 <https://earthquake.usgs.gov/earthquakes/eventpage/usp0008btk#finite-fault>).

391

### 392 5.2 1923 tsunamis

393 There are reasons to favor either or both the 3 February 1923 and the 13 April 1923 Kamchatka tsunamis as the  
394 generator(s) of the deposit above  $KS_{1907}$  that we identify as “1923.” Given what is known, south Kamchatsky Bay is  
395 the place most likely to have *comparable* runups from each. Both tsunamis have a record in Hilo, but one is runup  
396 and the other tide-gage amplitude (Table 1). There is no case on Kamchatka of a pair of similarly measured records  
397 from the same locality with which to compare the two tsunamis, with the exception of observations that the April  
398 tsunami generated more damage at the Tsutsumi fish plant southeast of Ust-Kamchatsk (Table S4). The 3 February  
399 tsunami was larger in most catalogued locations (Table S4) but apparently smaller than April 1923 in *north*  
400 Kamchatsky Bay. The two 1923 tsunamis both occurred while the ground would have been snow covered so that  
401 following snowmelt, it would be nearly impossible to distinguish two different deposits in this case. The source  
402 regions of the two 1923 Kamchatka tsunamis have been mapped (Fig. 1) but are not easy to constrain in detail other  
403 than that the February earthquake was south of Kronotsky and the April earthquake north of it. The February  
404 earthquake has been catalogued as Mw 8.3 and the April earthquake as Mw 7.3 (Table S3), but the local and far-  
405 field tsunami runup for April 1923 suggests it was significantly larger (Gusev and Shumilina, 2004); Gusev suggests



406 Mw 8.2 for the April earthquake. A moment magnitude around 8 would be more consistent with its tide-gage  
407 amplitude in Hilo (Fig. S2).

408

### 409 5.3 Chile1960 deposit

410 Between “1923” and 1997 deposits on a few profiles (Table 3), there is a thin, patchy and less extensive deposit  
411 which we attribute to the 1960 Chile tsunami (e.g., Fig. 4, right). We favor 1960 over 1952 Kamchatka because the  
412 1960 tsunami was larger than 1952 in the Kamchatsky Bay region (Table 1). Also, the regionally generated 1952  
413 tsunami decreases in amplitude toward the north on Kamchatka (Zayakin and Luchinina, 1987; also see MacInnes et  
414 al., 2010), whereas the distally generated Chilean tsunami on Kamchatka is little affected by latitude. Supporting  
415 the 1960 interpretation, in one excavation on profile 001, this intermediate tsunami deposit lies above a Bezymianny  
416 1955 tephra layer (Fig. 7).

417

### 418 5.4 Historical tsunami deposit close below KS<sub>1907</sub>

419 In many excavations (e.g., profile 100 in Fig. 4, Profile 110 in Fig. 8), there is a tsunami deposit within a few cm of  
420 the base of KS<sub>1907</sub> and which is comparable to 1997 and 1923 in thickness and extent. Although pre-1907  
421 sedimentation rates are difficult to quantify this tsunami deposit must fall within the historical period, which extends  
422 back to 1737. However, we cannot assign a specific event to this deposit; the more complete historical records are  
423 from southern Kamchatka, and the second half of the 19<sup>th</sup> century record is particularly spotty (Gusev and  
424 Shumulina, 2004).

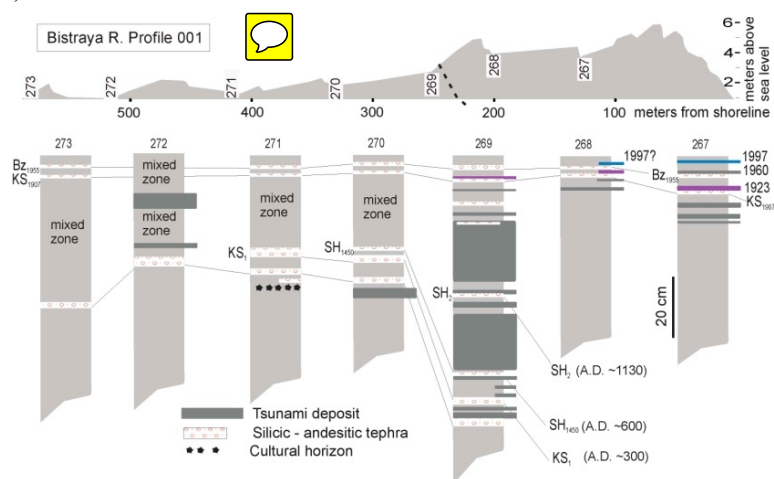

425

426 **Figure 7.** Northernmost profile, southern Kamchatsky Bay (Fig. 1 location; more extensive key in Fig. 4). This  
427 profile shows evidence of subsidence through time -- the landward part of the profile is lower. This lower profile  
428 has been subjected to river erosion -- the “mixed zone” is mostly fluvial sediment containing clasts of older material.  
429 Excavations having this mixed zone (273 to 270) all contain a tephra older than KS<sub>1</sub>, indicating that older strata are  
430 preserved below the reworked material. In this profile 001, there is an ash layer from the 1955 eruption of  
431 Bezymianny, a year before its major eruption. With this tephra present, we can assign the tsunami deposit above (in  
432 excavation 267) to Chile 1960 rather than to Kamchatka 1952.

433

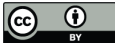

14

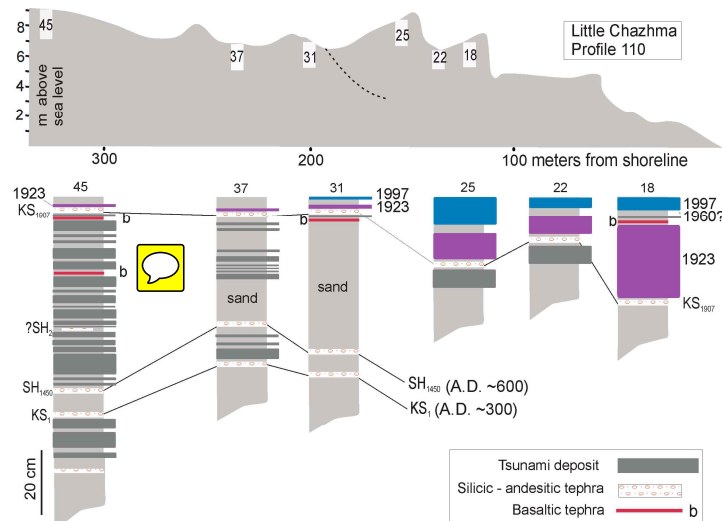

434  
435 **Figure 8.** Profile 110, Chazhma area (Fig. 1 location; more extensive key in Fig. 4). This profile has been uplifted  
436 through time – the landward part of the profile is higher. Exc. 45 contains many tsunami sand layers currently at  
437 high elevation, which when reconstructed were lower (Fig. S5). The profile shows the distribution of 20<sup>th</sup> century  
438 deposits, as well as a tsunami deposit very close below KS<sub>1907</sub>. The 1923 tsunami(s) reached the highest point  
439 shown on this profile, whereas 1997 and “below KS<sub>1907</sub>” were smaller. The deposit we tentatively assigned to Chile  
440 1960 on this profile is not included in Table 3 because the deposit was not well preserved; it is higher than any other  
441 excavation containing a deposit we attribute to Chile 1960.  
442

442

443

#### 444 **6 Tsunami deposits pre-20<sup>th</sup> century back to KS<sub>I</sub> (~A.D. 300)**

445 Goals in reconstructing paleotsunami history include both scientific and practical objectives. Scientifically, southern  
446 Kamchatsky Bay paleotsunamis can help us see patterns of subduction zone behavior. Are the historical tsunamis  
447 (and their generating earthquakes) comparable to events in the past? What is the “typical” event and what are the  
448 rupture patterns of the northern Kamchatka subduction zone? Practically, these questions apply also to probabilistic  
449 hazard analysis – at what frequencies do tsunamis occur and what is their size-frequency relationship?

450

#### 451 **6.1 Occurrence and Size**

452 For the record and analysis of tsunami deposits below KS<sub>1907</sub>, for each excavation we count the number of deposits  
453 between marker tephra and determine the approximate elevation above sea level and distance from shore of the  
454 excavation locale in that time (tephra) interval (Fig. S5). For some deposits, this excavation may be their limit and  
455 for others not (e.g., Fig. 9). We do not attempt to correlate sand layers from excavation to excavation (or profile to  
456 profile), though there are cases where it is possible. Rather, we count **the maximum number of tsunami deposits**  
457 between tephra, which is our indication of how many tsunami events have occurred.

458

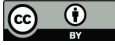

15

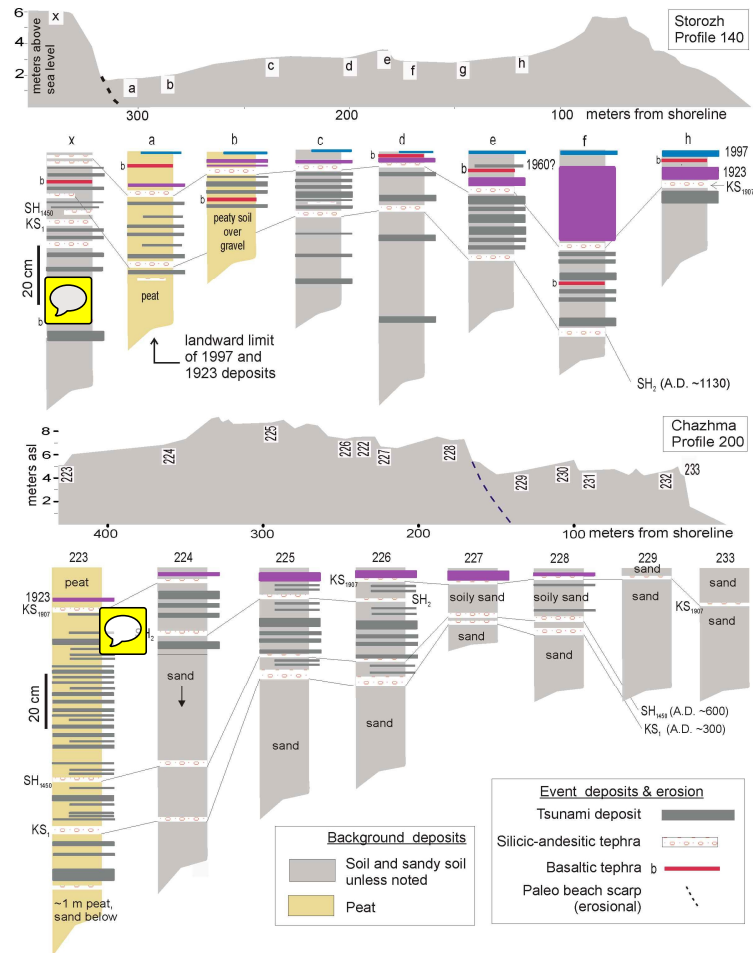

459

460 **Figure 9.** Example of two profiles that illustrate paleotsunami deposits used in analyses. Also see Figs. 4, 7, 8)  
461 **Storozh Profile 140 (top).** Here we use this profile to illustrate an analysis of tsunami deposits between  $KS_{1907}$  and  
462  $SH_2$ ; note that the deposits thin landward, in general. In most excavations there are six tsunami deposits between  
463  $KS_{1907}$  and  $SH_2$ ; excavation “x” has only three. Thus all six tsunamis reached “a” but only three reached “x”; or,  
464 three of the six tsunamis only reached “a”. All six tsunamis had to exceed the height of the shoreward beach ridge.  
465 **Chazhma Profile 200 (bottom).** As in Profile 110 (Fig. 8) this profile has undergone uplift through time. For sub-  
466  $SH_2$  deposits, the profile was reconstructed to 4 m lower and 150 m narrower. Sites 229-233 are young; the profile  
467 from 228 landward is older than  $KS_1$  (A.D. ~300). Site 223 is not far from the modern Chazhma River and in the  
468 past some tsunamis may have flooded this site via the river, when the profile was lower. Sites 226 and 225 both  
469 have six deposits between  $SH_2$  and  $SH_{1450}$ ; no other excavation on this profile provides a good count in this interval,  
470 but these six deposits probably are in the record at 223, and 224 was simply too sandy to count all layers in this  
471 interval.  $SH_2$  is not preserved (was not detected) in the peat excavation (223), but the 23 tsunami deposits in this  
472 excavation can be used in the overall count above  $KS_1$ . Excavations 223, 225 and 226 all preserve tsunami deposits  
473 between  $SH_{1450}$  and  $KS_1$ . In this interval the peat excavation (223) contains six deposits to the two in 225 and 226,  
474 for two possible reasons; first, peat is a better preserver/displayer of thin layers, and second, 223 is lower than 225  
475 and 226 and at this time all were closer to shore. For the latter reason, 223 may have received tsunamis and their  
476 deposits directly from the river rather than over the beach ridge(s).



477 In order to summarize paleotsunami sizes, we determine sediment runup--or the highest point seaward,  
478 whichever is higher--and sediment inundation for tsunami deposits on each profile. For each tephra interval along  
479 each profile, there will be deposits at maximum distances and maximum elevations; the two measures are treated  
480 separately because tsunami deposits are not correlated (in fact, high runup is associated with shorter, steeper profiles  
481 and long inundation with low-relief profiles). For example, for the historical deposits, two points are plotted (Fig.  
482 10) – their point of maximum inundation and their point of maximum runup, which are ~~on~~ usually on separate  
483 profiles.

484 A few of the paleo-events are comparable to Chile 1960 (Fig. 10), but most are likely from locally  
485 generated tsunamis because Chile 1960 was an outsized event and its deposits is not well represented on the profiles.  
486 The 1997 tsunami has dimensions similar to the majority of paleotsunamis as represented by sediment runup of on  
487 the order of 5-7 m (Fig. 10). The “1923” deposit, for which we do not know if related to February or April or both,  
488 is a “typical largest” event (Fig. 10). Recall that in these field sites there are few excavations at elevations of 10 m  
489 or more (Fig. S6), and that these higher elevations are on uplifted profiles, so we do not have a record of older  
490 paleotsunamis reaching such elevations, simply as an artefact of the data and analysis (Fig. S5). This issue is  
491 present also for paleo- inundation on prograding profiles, but is not such a strong artefact in this dataset. Overall,  
492 the number of deposits tends to decrease away from the coast and at higher elevations (density of points on Fig. 10),  
493 although there is a lot of scatter in the data, likely due to preservation and identification differences (e.g., Fig. 9).

494

495 **Figure 10.** Three-dimensional diagram summarizing  
496 sediment runup and inundation for tsunami deposits,  
497 south Kamchatsky Bay, above  $KS_1$  tephra (A.D. ~300, up  
498 through A.D. 2000) (from data plotted in Figs. S7 and S8).  
499 The three historical tsunami deposits are highlighted with  
500 their two points of maximum runup and maximum  
501 inundation, which do not coincide. For prehistoric events,  
502 we calculated (sediment) runup and inundation per tephra  
503 interval, with adjustments for changes through time in  
504 shoreline location and excavation elevation (see text and  
505 Fig. S5). The axis “average time between deposits” is  
506 biased by deposit counts and short time intervals but is  
507 shown here for general pattern.

508

509

## 510 6.2 Recurrence

511 To determine tsunami recurrence according to size, we consider all tsunami deposits above  $KS_1$  (A.D.  
512 ~300) (Fig. 11). There are intermediate Shiveluch tephra layers between  $KS_{1907}$  and  $KS_1$  (Table 2), but their  
513 presence is not consistent enough to break down recurrence statistics, and the time intervals are relatively short  
514 relative to the number of events, so statistical analysis cannot be supported. For this exercise, we only use  
515 excavations now at or reconstructed to be more than 5 m above sea level or landward of a beach ridge (reconstructed  
516 to be) higher than 5 m. The grand total of the maximum number of events per each interval is 18 deposits, including

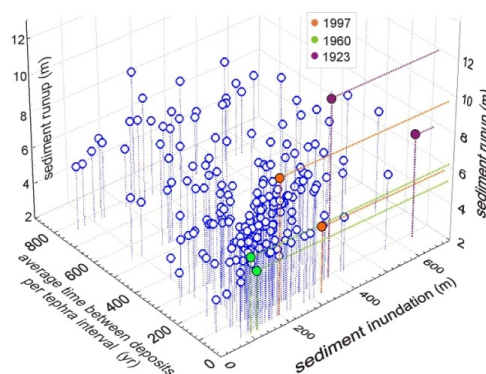





517 the historical cases. For each event, we determine a maximum sediment runup, that is, if there are four deposits  
518 between two marker tephra on a given profile, we determine the four highest points those deposits reach; e.g., two  
519 may reach 8.3 m and the other two only 7.2 m (all four reaching 7.2 m). We use reconstructed distances and  
520 elevations for each time interval below  $KS_{1907}$ . The maximum elevation is either sediment runup,  $h$ , or maximum  
521 elevation before sediment runup,  $H$  (as in Fig. 5), whichever is higher. Independent of the determined maximum  
522 elevation, we determine a maximum sediment inundation for each deposit in each tephra interval.

523 All 18 deposits reached elevations of 5 m (smaller not considered) and inland distances of 100 m, each  
524 factor with a recurrence interval of about 100 years (Fig. 11). Note again that runup and inundation are not paired;  
525 high runup commonly occurs on shorter, steeper profiles and long inundation on lower profiles. Tsunamis reaching  
526 an elevation of at least 7 m have a recurrence of ~200 years (Fig. 11). The largest reconstructed tsunamis as  
527 recorded by tsunami deposits have runup of 10 m or more and occur on average every 425 yr. Tsunamis with  
528 inundation of 600 m or more occur on average every ~570 yr.

529

530 **Figure 11.** Tsunami (>5 m) recurrence for  
531 exceeded elevations (sediment runup) and  
532 exceeded distances from shoreline (sediment  
533 inundation) of tsunami deposits since  $KS_1$  (A.D.  
534 ~300) in south Kamchatsky Bay. (For runup,  
535 integers of m are shown; for inundation,  
536 multiples of 100 m.) For example, tsunamis  
537 with runup of 8-9 m or more occur on average  
538 every 283 years. Tsunamis exceeding  
539 inundation of 500 m occur on average every  
540 340 years. Recall that runup and inundation are  
541 not paired (see text).

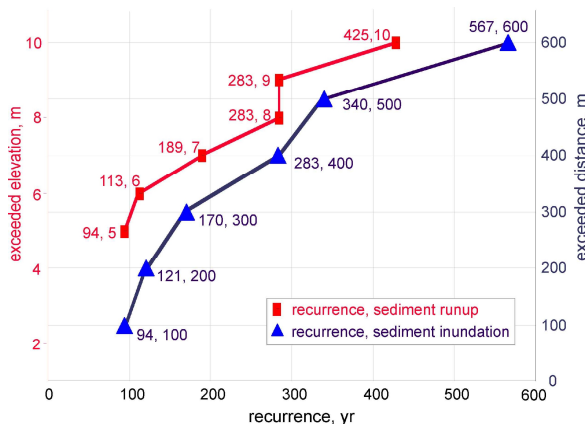

542

## 544 7 Discussion and conclusions

### 545 7.1 Historical tsunamis

546 This work adds to the tsunami catalogue for 1997 Kronotsky and 1960 Chile, but not February or April  
547 1923 Kamchatka events because we cannot differentiate the (two) 1923 deposits. The nearfield nature of the 1997  
548 Kronotsky tsunami is significantly revised by this study of coastal profiles north of the Kronotsky Peninsula, adding  
549 substantial data to its catalogue. The 1997 tsunami reached runup heights of more than 9 m, averaging 6 m over  
550 about 60 km of coastline. As would be expected, tsunami heights (as indicated by deposits) and inundation  
551 distances are influenced by the coastal topography, with higher runups on steep profiles and higher inundation on  
552 lower-relief profiles. Data catalogues do not commonly provide topographic profiles, yet this information can be  
553 critical to understanding a tsunami and its generating source.

554 Based on deposits from 15 profiles and more than one hundred excavations, we conclude that the 1923  
555 tsunami (February or April indeterminate) was larger than the December 1997 Kronotsky tsunami, but the summary  
556 and tabulated data (Fig. 6, Table 3) are tricky to interpret, with sediment inundation ( $L$ ) being more indicative of

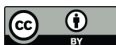

557 tsunami size than runup (h) or highest point seaward of runup (H). On the basis of the total number of profiles  
558 exhibiting a deposit, “1923” is more extensive, but its average sediment runup (h) value is lower because the farthest  
559 point it reached on a number of profiles is actually lower than the points for 1997. Moreover, even though “1923”  
560 exceeded more of the high beach ridges seaward of the (sediment) runup point (H), the average of those is almost  
561 the same as for 1997 (Table 3). The most telling measurements distinguishing 1997 from “1923” are sediment  
562 inundation distances, with the average for “1923” almost twice that for 1997.

563 The 1952 tsunami deposit in southern Kamchatka (and the northern Kuril Islands) (MacInnes et al., 2010)  
564 reaches greater heights and inundation distances along its earthquake rupture zone than any of the historical tsunami  
565 deposits along the northern part of the Kamchatka subduction zone (this study; Pinegina, 2014). While this  
566 observation is not surprising given that 1952 was Mw 9.0 and the historical events to the north no larger than about  
567 Mw 8.5, the question to address is, can (does) the northern part of the subduction zone produce Mw 9 events, or  
568 does Kronotsky Cape represent an asperity that keeps ruptures shorter, as in 1923? For that, we must turn to the  
569 prehistoric record.

570

## 571 **7.2 Implications for the 1997 Kronotsky earthquake rupture and the 1923 events**

572 The sediment runup and inundation data reported here require a reevaluation of rupture source models for  
573 the 1997 Kronotsky earthquake; models which place most rupture energy to the south of or under the peninsula are  
574 not consistent with the tsunami data. The tsunami, rather than being unusually small for its generating earthquake’s  
575 moment magnitude (Sohn, 1998), generated runup averaging 6 m over about 60 km of coastline, and 30 cm  
576 amplitude on the Hilo tide gage, requiring a “normal” offshore, subduction-zone rupture under a substantial depth of  
577 water. Some significant portion of that rupture must be under substantial water depth to produce the indicated  
578 tsunami north of Kronotsky Cape, while not generating as much runup on the Cape, or to the south. While part of  
579 the rupture could well have been under the Kronotsky Peninsula and the relatively shallow region directly offshore,  
580 deformation in deeper water east and north of the peninsula is needed.

581 We conclude that a rupture consistent with the mainshock and aftershock locations from Kamchatka’s  
582 network are more reasonable than more westerly locations, e.g., in the ISC catalogue (Fig. 2, Table S2). This issue  
583 is illustrated by Hayes (2017) inversion, which takes the NEIC hypocentral location (Table S2) to start and, while  
584 his inversion results in most slip to the north (Fig. S9), locates that slip under the peninsula, where it cannot generate  
585 a tsunami.

586 The northern part of the Kamchatka subduction zone ruptured in two large events in February 1923 and  
587 April 1923 (Fig. 1), and our study requires that a substantial portion of the energy released by the 1997 Kronotsky  
588 earthquake was generated in a seismic gap between those earthquakes (Fig. 1), as originally recognized by Fedotov  
589 et al. (1998) and predicted by his group’s earlier work. The Kronotsky Peninsula lies landward of the (subducting)  
590 Emperor Seamount chain, which has been postulated to generate an asperity and is characterized by a relatively  
591 strong positive gravity anomaly (e.g., Bürgmann et al., 2005, Llenos and McGuire, 2007; Bassett and Watts, 2015)  
592 (Fig. S9). That asperity may well keep the northern Kamchatka subduction zone from generating (Mw 9) 1952-  
593 scale Kamchatka earthquakes, but it does rupture, as required by the tsunami data presented herein.



594 **7.3 Paleotsunami results – implications for tectonic studies and hazard analyses**

595 Southern Kamchatsky Bay has a relatively short but well-preserved record of paleotsunami deposits which  
596 can be calibrated with the historical record. Combined with the record in north Kamchatsky Bay (Pinegina et al.,  
597 2012) (the central bay is characterized by cliffs), the pattern of runup and inundation in the prehistoric record for the  
598 last 1700 years does not diverge from the 20<sup>th</sup> century record. Compared with southern Kamchatka, the region  
599 where Mw 9-scale events occurred in 1952 and 1737, the northern subduction zone has generated smaller and less  
600 extensive tsunamis, in agreement with analyses of Bürgmann et al. (2005) for the modern and Pinegina (2014) for  
601 the prehistoric record.

602 A robust, 1700-year-long record may be sufficient to generate a probabilistic hazard analysis that can be  
603 used for both local and far-field hazard studies, and not only for tsunami recurrence statistics, but also for recurrence  
604 statistics that include tsunami size. Reconstructing paleo- runup and paleo- inundation requires, and is thus limited  
605 by, accurate reconstructions of past shoreline locations and past (relative) sea levels. **Coastlines with well-**  
606 **established marker tephra enable such reconstructions.**

607 As are seismologists, paleoseismologists are cautioned by the lessons of the 11 March 2011 Tohoku  
608 earthquake and tsunami to qualify our generalizations. Characterizing subduction-zone behavior and quantifying its  
609 hazards are goals which we will only ever accomplish imperfectly.

610 **Supplement link (will be included by Copernicus)** – see supplemental material

611 **Author contribution** – we contributed equally and together

612 **Competing interests** -- none

613 **Acknowledgments**

614 Field research was supported by grants from the Russian Foundation for Fundamental Research (00-05-  
615 64697- to T.K. Pinegina), the National Geographic Foundation to Vera Ponomareva, and the U.S. National Science  
616 Foundation (EAR 9903341 to J. Bourgeois). Research and manuscript preparation were supported by RFBR grant  
617 15-05-02651- to T. Pinegina and a U.S. Fulbright Foundation award to J. Bourgeois, which supported her visit to the  
618 Institute of Volcanology and Seismology, winter/spring of 2017.

619 We thank Vera Ponomareva for field advice and discussions regarding tephra stratigraphy and analysis;  
620 Alexander Lander for discussions concerning the nature of the 1997 Kronotsky earthquake; Alexander Gusev for  
621 discussions regarding the 1997 and earlier large earthquakes on Kamchatka; Vasily Titov for insights into the 1997  
622 Kronotsky tsunami; and Vadim Saltykov for his helpful recommendations about statistical analyses of tsunami  
623 recurrence. We are grateful to Alexander Storcheus (deceased), Leonid Kotenko, Ivan Storcheus and Edward  
624 Cranswick for their field assistance. Roland Bürgmann, Andrea Llenos and Gavin Hayes offered helpful insights  
625 into their source models for 1997 Kronotsky.



626 **References**

- 627 Ammon, C. J., Kanamori, H. and Lay, T.: A great earthquake doublet and seismic stress transfer cycle in the central  
628 Kuril islands, *Nature* 451.7178, 561-565, doi:10.1038/nature06521, 2008.
- 629 Balakina, L.M.: The October 4, 1994 Shikotan and December 5, 1997 Kronotsky earthquakes and their strongest  
630 aftershocks as regular manifestations of the tectonic process in the Kuril-Kamchatka seismogenic zone,  
631 *Izvestiya - Russian Academy of Sciences, Physics of the Solid Earth*, 36, 903-918, 2000.
- 632 Bassett, D. and Watts, A. B.: Gravity anomalies, crustal structure, and seismicity at subduction zones: 1. Seafloor  
633 roughness and subducting relief, *Geochemistry, Geophysics, Geosystems*, 16, 1508-1540,  
634 doi/10.1002/2014GC005684, 2015.
- 635 Bourgeois, J.: Geologic effects and records of tsunamis, Chapter 3 in *The Sea*, volume 15, *Tsunamis*, Harvard  
636 University Press, 55-91, 2009.
- 637 Bourgeois, J., and Titov, V.V.: A Fresh Look at the 1997 Kronosky Tsunami, *Transactions of the European*  
638 *Geophysical Society, Abstracts*, 2001.
- 639 Bourgeois, J., Pinegina, T., Ponomareva, V. and Zaretskaia, N.: Holocene tsunamis in the southwestern Bering Sea,  
640 Russian Far East, and their tectonic implications, *Geological Society of America Bulletin*, 118, 449-463,  
641 doi: 10.1130/B25726.1, 2006.
- 642 Braitseva, O.A., Ponomareva, V.V., Sulerzhitsky, L.D., Melekestsev, I.V. and Bailey, J.: Holocene key-marker  
643 tephra layers in Kamchatka, Russia, *Quaternary research*, 47, 125-139, doi.org/10.1006/qres.1996.1876, 1997.
- 644 Bürgmann, R., Kogan, M.G., Levin, V.E., Scholz, C.H., King, R.W. and Steblov, G.M.: Rapid aseismic moment  
645 release following the 5 December, 1997 Kronotsky, Kamchatka, earthquake, *Geophys. Res. Lett.*, 28, 1331-  
646 1334, doi: 10.1029/2000GL012350, 2001.
- 647 Bürgmann, R., Kogan, M.G., Steblov, G.M., Hilley, G., Levin, V.E. and Apel, E.: Interseismic coupling and  
648 asperity distribution along the Kamchatka subduction zone, *J. Geophys. Res.*, 110, B07405,  
649 doi/10.1029/2005JB003648, 2005.
- 650 Fedotov, S.A., Chernyshev, S.D., Matviyenko, Y.D., and Zharinov, N.A.: Prediction of Kronotskoye earthquake of  
651 December 5, 1997,  $M = 7.8-7.9$ , Kamchatka, and its strong aftershocks with  $M \geq 6$ , *Volcanology and*  
652 *Seismology*, 6, 3-16, 1998, [in Russian].
- 653 Godzikovskaya, A.A.: Summary of macroseismic information on Kamchatka earthquakes (Pre-instrumental and  
654 early instrumental observation period), *Moscow – Petropavlovsk-Kamchatsky*, 134 pp., 2010 [in Russian].
- 655 Gordeev, E.I., Ivanov, B.V. and Vikulin, A.V. (eds.): *Kronotskoye earthquake of December 5, 1997 on Kamchatka,*  
656 *Petropavlovsk-Kamchatsky, Kamchatkan State Academy of Fishing Marine*, 294 pp., 1998, [in Russian with  
657 English abstracts and figure captions].
- 658 Gordeev, E.I., Gusev, A.A., Levin, V.E., Bakhtiarov, V.F., Pavlov, V.M., Chebrov, V.N. and Kasahara, M.:  
659 Preliminary analysis of deformation of the Eurasia-Pacific-North America plate junction from GPS data,  
660 *Geophys. J. Int.*, 147, 189-198, doi: <https://doi.org/10.1046/j.0956-540x.2001.01515.x>, 2001.



- 661 Gusev, A.A., Levina, V.I., Saltykov, V.A., and Gordeev, E.I.: Large Kronotskoye earthquake of Dec. 5, 1997: basic  
662 data, seismicity of the epicentral zone, source mechanism, macroseismic effects, in Gordeev et al., eds., 32-54,  
663 1998 [In Russian with English abstract and figure captions].
- 664 Gusev, A. A.: The schematic map of the source zones of large Kamchatka earthquakes of the instrumental epoch: in  
665 Complex seismological and geophysical researches of Kamchatka. To 25th Anniversary of Kamchatkan  
666 Experimental & Methodical Seismological Department, Ed. by Gordeev E.I., Chebrov V.N., Petropavlovsk-  
667 Kamchatsky, 445 pp., 2004.
- 668 Gusev, A.A. and Shumilina, L.S.: Recurrence of Kamchatka strong earthquakes on a scale of moment magnitudes,  
669 *Izvestiya, Physics of the Solid Earth*, 40, 206-215, 2004.
- 670 Hayes, Gavin P.: The finite, kinematic rupture properties of great-sized earthquakes since 1990, *Earth and Planetary*  
671 *Science Letters*, 468, 94-100, doi: <https://doi.org/10.1016/j.epsl.2017.04.003>, 2017.
- 672 Kuzin, I.P., Levina, V.I., and Flenov, A.B.: Body wave velocity distribution in the Benioff zone of central  
673 Kamchatka during aftershocks of the Kronotskii earthquake of 1997 ( $M = 7.9$ ), *J. Volcanology & Seismology*,  
674 1, 175-184, doi: 10.1134/S0742046307030037, 2007.
- 675 Kyle, P. R., Ponomareva, V. V., and Schlupe, R. R.: Geochemical characterization of marker tephra layers from  
676 major Holocene eruptions, Kamchatka Peninsula, Russia, *International Geology Review*, 53, 1059-1097,  
677 <http://dx.doi.org/10.1080/00206810903442162>, 2011.
- 678 Leonov, V.L.: Ground ruptures, landslides and rockfalls caused by the earthquake on December 5, 1997 at the sea-  
679 board of Kronotsky Peninsula: in Gordeev et al., eds., 240-246, 1998.
- 680 Levina, V. I., Lander, A. V., Mityushkina, S. V., and Chebrova, A. Y. The seismicity of the Kamchatka region:  
681 1962–2011, *Journal of Volcanology and Seismology*, 7, 37-57, doi:10.1134/S0742046313010053, 2013.
- 682 Llenos, A. L., and McGuire, J. J.: Influence of fore arc structure on the extent of great subduction zone  
683 earthquakes, *Journal of Geophysical Research: Solid Earth*, 112, B09301, doi:10.1029/2007JB004944, 2007.
- 684 Liu, P. L. F.: Tsunami modeling: propagation, *The Sea*, 15, 295-319, 2009.
- 685 MacInnes, B. T., Pinegina, T. K., Bourgeois, J., Razhigaeva, N. G., Kaistrenko, V. M., and Kravchunovskaya, E. A.:  
686 Field survey and geological effects of the 15 November 2006 Kuril tsunami in the middle Kuril Islands:  
687 In *Tsunami Science Four Years after the 2004 Indian Ocean Tsunami*, Birkhäuser Basel, 9-36, doi  
688 10.1007/s00024-008-0428-3, 2009.
- 689 MacInnes, B.T., Weiss, R., Bourgeois, J. and Pinegina, T.K.: Slip distribution of the 1952 Kamchatka great  
690 earthquake based on near-field tsunami deposits and historical records, *Bulletin of the Seismological Society of*  
691 *America*, 100, 1695-1709, doi: 10.1785/0120090376, 2010.
- 692 MacInnes, B., Kravchunovskaya, E., Pinegina, T., and Bourgeois, J. Paleotsunamis from the central Kuril Islands  
693 segment of the Japan-Kuril-Kamchatka subduction zone, *Quaternary Research*, 86, 54-66,  
694 <https://doi.org/10.1016/j.yqres.2016.03.005>, 2016.
- 695 Martin, M. E., Weiss, R., Bourgeois, J., Pinegina, T. K., Houston, H. and Titov, V. V. Combining constraints from  
696 tsunami modeling and sedimentology to untangle the 1969 Ozernoi and 1971 Kamchatskii tsunamis, *Geophys.*  
697 *Res. Lett.*, 35, L01610, doi:10.1029/2007GL032349, 2008.



- 698 Melekestsev, I.V., Braitseva, O.A., Erlikh, E.N., Shantser, A.E., Chelebaeva, A.I., Lupikina E.G., Egorova, I.A.,  
699 Kozhemyaka, N.N.: Kamchatka, Komandor and Kurile Islands, Moskow, Nauka, 439 pp., 1974 [in Russian].
- 700 Nanayama, F., Furukawa, R., Shigeno, K., Makino, A., Soeda, Y. and Igarashi, Y.: Nine unusually large tsunami  
701 deposits from the past 4000 years at Kiritappu marsh along the southern Kuril Trench, *Sedimentary*  
702 *Geology*, 200, 275-294, <https://doi.org/10.1016/j.sedgeo.2007.01.008>, 2007.
- 703 NCEI, National Centers for Environmental Information (formerly NGDC), Natural Hazards Data, Images and  
704 Education, Tsunami and Earthquake databases: <https://www.ngdc.noaa.gov/hazard/hazards.shtml>
- 705 Okal, E.A. and Synolakis, C.E.: Source discriminants for near-field tsunamis, *Geophysical Journal International*, 158,  
706 899-912, DOI: <https://doi.org/10.1111/j.1365-246X.2004.02347.x>, 2004.
- 707 Petukhin, A.G., Dontsov, O.V., Kozlov, V.N., and Sinityn, V.I.: Preliminary analysis of strong ground-motion  
708 records of the Kronotskoye earthquake of December 5, 1997 (Mw = 7.9): in Gordeev et al., eds., 247-256, 1998,  
709 [In Russian with English abstract and figure captions].
- 710 Pinegina T. K.: Time-space distribution of tsunamigenic earthquakes along the Pacific and Bering coasts of  
711 Kamchatka: insight from paleotsunami deposits, Doctor of Geological Science dissertation, Institute of  
712 Oceanology RAS, Moscow, 235 pp., 2014 [in Russian].
- 713 Pinegina, T. K., Kozhurin, A. I., Ponomareva, V. V.: Seismic and tsunami hazard assessment for Ust-Kamchatsk  
714 settlement, Kamchatka, based on paleoseismological data, *Bulletin of Kamchatka regional association*  
715 "Educational-scientific center". *Earth sciences*. 1, 138-159, 2012 [in Russian with English abstract].
- 716 Pinegina, T.K., Bourgeois, J., Kravchunovskaya, E.A., Lander, A.V., Arcos, M.E., Pedoja, K. and MacInnes, B.T.:  
717 A nexus of plate interaction: Vertical deformation of Holocene wave-built terraces on the Kamchatsky  
718 Peninsula (Kamchatka, Russia), *Geological Society of America Bulletin*, 125, 1554-1568,  
719 doi: 10.1130/B30793.1, 2013.
- 720 Ponomareva, V., Portnyagin, M., Pendea, I.F., Zelenin, E., Bourgeois, J., Pinegina, T., and Kozhurin A. A.: A full  
721 Holocene tephrochronology for the Kamchatsky Peninsula region: applications from Kamchatka to North  
722 America, *Quaternary Science Reviews*, 2017 [in press].
- 723 Slavina, L.B., Pivovarova, N.B. and Levina, V.I.: A study in the velocity structure of December 5, 1997, Mw = 7.8  
724 Kronotskii rupture zone, Kamchatka, *J. Volcanology & Seismology*, 1, 254-262,  
725 doi:10.1134/S0742046307040045, 2007.
- 726 Sohn, S.W.: The 1997 Kamchatka earthquake. *Individual Studies by Participants at the International Institute of*  
727 *Seismology and Earthquake Engineering*, Tokyo, International, 34, 91-99, 1998.
- 728 Song, T. R. A. and Simons, M.: Large trench-parallel gravity variations predict seismogenic behavior in subduction  
729 zones, *Science*, 301, 630-633, DOI: 10.1126/science.1085557, 2003.
- 730 Zayakin, Yu. A. and Luchinina, A.A.: Catalogue tsunamis on Kamchatka, Obninsk: Vniigmi-Mtsd, 51pp., 1987,  
731 [Booklet in Russian].
- 732 Zayakin, Yu. A. and Pinegina, T.K.: Tsunami in Kamchatka on December 5, 1997: in Gordeev et al., eds., 257-263,  
733 1998, [In Russian with English abstract and figure captions].

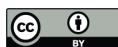

- 734 Zobin, V.M. and Levina, V.I.: The rupture process of the Mw 7.8 Cape Kronotsky, Kamchatka, earthquake of 5  
735 December 1997 and its relationship to foreshocks and aftershocks, *Bull. Seis. Soc. Am.*, 91, 1619-1628,  
736 doi: 10.1785/0119990116, 2001.

## Supplement to accompany J. Bourgeois & T.K. Pinegina

### 1997 Kronotsky earthquake and tsunami and their predecessors, Kamchatka, Russia

#### Earthquake and tsunami data

This supplement includes a reproduction of the original figure by Gusev (2004) of source regions for large Kamchatka earthquakes since 1899 (Fig. S1). In our paper, we use a revised version of this figure and discuss the bases for our suggested revisions.

Tsunamis have arrived to Kamchatka not only from local earthquakes but also from other regions, of which Kamchatka is particularly susceptible to tsunamis from Chile; Kamchatka is shadowed (protected) from non-local tsunamis originating in the North Pacific (Table S1; localities on Fig. S2). In order to interpret 20<sup>th</sup> century tsunami deposits in our field sites, we use these data to evaluate the possibility that at least one of the deposits is from a far-field event, Chile 1960.

Table S2 provides a summary of different researchers' assignments of moment magnitude, locations of mainshock epicenter and hypocenter, and centroid determinations for the December 1997 Kronotsky earthquake. There are some significant differences, which we discuss in our paper in terms of our documented evidence for tsunami runup averaging about 6 m along the coast north of Kronotsky Peninsula.

Figure S3 is a version of a previously published photo and sketch interpretation of 1997 Kronotsky tsunami effects on Kronotsky Cape (Pinegina et al., 2003).

The magnitudes of tsunamigenic and other large earthquakes originating along the Kamchatka subduction zone (and to its north) have been evaluated by Gusev and Shumilina (2004), with some suggested revisions to other catalogues (Table S3). One indicator of moment magnitude of earthquakes originating along the Kuril-Kamchatka subduction zone is their tide-gage amplitude in Hilo, Hawaii, as shown in Table S3 for all historical earthquakes and in Figure S4 for events with a tide-gage record in Hilo.

In A.D. 1923, there were two tsunamigenic earthquakes along the northern Kamchatka subduction zone. Table S4 is a compilation of information about those two tsunamis, which both affected Kamchatsky Bay. These observations and data help us evaluate which of these two tsunamis may have affected our field area in south Kamchatsky Bay.

#### Methodology for reconstructing paleoshorelines (Figure S5)

Many profiles show evidence of changes through time in beach-plain width and in surface elevation relative to sea level; that is, the shoreward, older parts of profiles are higher or lower than the seaward parts (Figure S5). Ideally, a reconstruction of the prehistoric coast and hence of paleotsunami size (runup and inundation as approximated by deposit extent) will include an estimate of horizontal shifts of shoreline location for paleo-inundation and an approximation of change in relative sea level for paleo-runup. We use tephra stratigraphy (as in Pinegina et al., 2013; MacInnes et al., 2016) and tephra mapping along profiles in order to reconstruct paleo-profiles. The reconstruction of the south Kamchatsky Bay profiles and their paleotsunamis was first performed and reported by Pinegina (2014).

**Horizontal changes** (Figure S5). We use the methods of Pinegina et al. (2013; also see MacInnes et al., 2016). These methods make an assumption that no widespread erosion has occurred, which is reasonable for the last 2000 years in south Kamchatsky Bay, but is a potential source of error. South Kamchatsky Bay profiles all indicate net progradation during the time interval examined. A tephra deposit is typically preserved in stratigraphy inland from the first dense vegetation (point *dv* on Figure S5) landward of the active (sandy) beach. Therefore, the seaward extent of a tephra in the stratigraphy (*dv1* or *dv3* in Figure S5) indicates the *dv* position at the time of eruption and ash deposition. Assuming today's active beach width is representative of the past, we



estimate the shoreline position at time “tephra x” to be the paleo  $dv(x)$  plus the modern active beach width. In general, our paleo- inundation estimates are minima because even though the beach-ridge plains are net progradational, short-lived periods of erosion can remove some of the accumulated coastal width. A general limitation to paleotsunami inundation reconstruction on a prograding shoreline is that **estimates of maximum paleo- inundation will decrease back in time** as the reconstructed beach plain width decreases. On the other hand, past erosion, which cannot be reconstructed, will result in an underestimate of beach plain width.

**Vertical changes** (Figure S5). In order to determine the change in land level relative to the sea, in each excavation we identify an elevation tied to sea level, for which we also use the point of the first growth of dense vegetation ( $dv$ , Figure S5). We measure and mark this point on our modern profiles and associate this point in excavations with good preservation of volcanic ash layers (tephra). The limit of dense vegetation approximates the swash limit and storm high tide, seaward of which tephra will rarely be preserved. Dense vegetation (primarily dune grass, *Elymus* sp.) grows only on the part of the profile that is rarely affected by storms, except for some washover, and thus soil-tephra cover begins to form on these surfaces. Net uplift or subsidence is the difference between the modern  $dv$  elevation and the paleo  $dv$  elevation (Figure S5). A general limit to paleotsunami runup estimates for the case of uplifting coastlines is that **maximum paleo- runup will decrease back in time as the reconstructions bring paleo- profiles downward.**

### **Historical and paleotsunami data, including excavation elevations and distances from shoreline**

Herein we summarize graphically the data on which our paleotsunami analysis is based. These data were first synthesized by Pinegina (2014) for many localities along the Pacific coast of Kamchatka. In this supplement, we include data from Ust-Kamchatsk (Pinegina et al. 2012; Pinegina 2014) because it is within (at the north end of) Kamchatsky Bay (Fig. S2).

The distribution of elevations (meters above sea level) and distances (meters from modern shoreline) of excavations in the field area, southern Kamchatsky Bay, are shown in Figure S6. We use these distances and elevations for reconstructing tsunami sediment runup and inundation for 20<sup>th</sup> century tsunami deposits (Fig. S7). For south Kamchatsky Bay, the maximum profile width is less than 800 m; in north Kamchatsky Bay, distances reach about 1.8 km (Figs. S7, S8).

The elevation and distance of tsunami deposits above  $KS_{1907}$ , including data from the Ust-Kamchatsk area, north Kamchatsky Bay, are shown in Figure S7. Some excavations contain no deposits above  $KS_{1907}$ . The deposit that is present in the most excavations we interpret as from 1923; the second-most extensive deposit is from 1997. Rarely there is a third deposit between the other two, which we assign to 1960 Chile.

The number of paleotsunami deposits per tephra interval for three intervals below  $KS_{1907}$  are shown in Figure S8, which includes data from north Kamchatsky Bay near Ust-Kamchatsk. For each interval, the elevation and distance from shoreline of each excavation is reconstructed using methods as in Figure S5.

### **Locations of the 5 December 1997 Kronotsky earthquake rupture, according to different studies**

Our tsunami-deposit study has implications for the rupture zone of the 1997 Kronotsky earthquake. Figure S9 is a compilation of several different models for the location of this rupture zone, from previously published work.

Table S1. HISTORICAL TSUNAMIS AFFECTING (or possibly affecting) THE KAMCHATSKIY BAY COAST OF KAMCHATKA\*

| EARTHQUAKE PARAMETERS |                                     |                      | RECORDS OF TSUNAMI RUNUP ( <i>tide gage records in italics</i> ) in meters |            |                      |             |              |                      |                                                                    |                       | MAX KAM    | Hilo, HI |      |
|-----------------------|-------------------------------------|----------------------|----------------------------------------------------------------------------|------------|----------------------|-------------|--------------|----------------------|--------------------------------------------------------------------|-----------------------|------------|----------|------|
| Date (local)          | Source region                       | Mw                   | Locations South to North Olga Bay to Bering Island                         |            |                      |             |              |                      |                                                                    |                       |            |          |      |
|                       |                                     |                      | Olga Bay                                                                   | Kron. Cape | CHAZHMA ADR-BIST     | Shuber-tovo | south of U-K | <i>U-K tide gage</i> | Kamch River                                                        | Bering I. (south)     |            |          |      |
| 5-Dec-97              | Kronotskiy Peninsula                | 7.8/7.9 <sup>^</sup> | 0.5-1                                                                      | 1.5        | this paper           |             |              |                      | <i>not working</i>                                                 | <i>incompl record</i> | this paper | 0.24     |      |
| 8-May-86              | Andreanof Islands#                  | 8                    |                                                                            |            |                      |             |              |                      | 0.04                                                               | 0.09                  | 0.09       | 0.28     |      |
| 4-Mar-85              | Chile                               | 7.7                  |                                                                            |            |                      |             |              |                      | 0.03                                                               |                       |            | 0.77     |      |
| 28-Dec-84             | Kamchatsky Strait                   | 7                    |                                                                            |            |                      |             |              |                      | 0.02                                                               | 0.17                  |            |          |      |
| 18-Aug-83             | Kamchatsky Bay                      | 6.8                  |                                                                            |            |                      |             |              |                      | 0.02                                                               |                       |            |          |      |
| 15-Dec-71             | Commander Is.                       | 7.8 <sup>^</sup>     |                                                                            |            |                      |             |              |                      | 0.47                                                               |                       |            | 0.10     |      |
| 23-Nov-69             | Bering Sea                          | 7.7                  |                                                                            |            |                      |             |              |                      | 0.2                                                                |                       | 10-15      | 0.10     |      |
| 04-Feb-65             | w. Aleutians                        | 8.7                  |                                                                            |            |                      |             |              |                      | only recorded on Petropavlovsk tide gage                           |                       | 0.08       | 0.30     |      |
| 28-Mar-64             | Alaskan Peninsula                   | 9.2                  |                                                                            |            |                      |             |              |                      | only recorded on Petropavlovsk tide gage                           |                       | 0.06       | ~3       |      |
| 24-May-60             | Chile                               | 9.5                  | 4                                                                          |            |                      |             |              | 3                    | 0.8                                                                | 3-4                   | 3-3.5      | 7        | ~10  |
| 05-Nov-52             | s. Kamchatka                        | 9                    | 10-13                                                                      |            |                      |             | 0.5-1        |                      | 0.1                                                                |                       | 2          | 10-15    | 1.1  |
| 02-Apr-46             | Aleutians                           | 8.1                  |                                                                            |            |                      |             |              |                      | no record on Kamchatka 0.1-0.2 in northern Japan, max 1.1 in Japan |                       | —          | ~9       |      |
| 14-Apr-23             | Kamchatskiy Bay                     | 7.3/8.2 <sup>^</sup> |                                                                            |            |                      |             |              |                      | 20-30                                                              | 11                    | 4          | 20-30    | 0.30 |
| 04-Feb-23             | Kronotskiy Bay                      | 8.5 <sup>^</sup>     | 4-5 km up river                                                            |            | 4-5 km up Chazhma R. |             |              |                      |                                                                    | 3                     |            | 6-8      | 6.10 |
| 17 May 1841           | s. Kamchatka                        | 9 <sup>^</sup>       |                                                                            |            |                      |             |              |                      |                                                                    |                       |            | 15       | 4.6  |
| August 1792           | Avachinsky Bay to n. Kamchatsky Bay | 8.25**               |                                                                            |            |                      |             |              |                      |                                                                    |                       |            |          |      |
| 15 Apr 1791           | Kamchatskiy Bay                     | (7.5) <sup>^</sup>   |                                                                            |            |                      |             |              |                      | effects 7 km upstream                                              |                       |            |          | —    |
| 4 Nov 1737            | N Kamchatskiy Bay                   | (7.8) <sup>^</sup>   |                                                                            |            |                      |             |              |                      |                                                                    |                       |            |          |      |
| 17 Oct 1737           | s. Kamchatka                        | 9.2 <sup>^</sup>     |                                                                            |            |                      |             |              |                      |                                                                    |                       |            | >30?     | —    |

\*Primary sources: Zayakin and Luchinina, 1987; NEIC (formerly NGDC) Natural Hazards Data, online

<sup>^</sup>Kamchatka Mw's from Gusev and Shumilin, 2004; G&S 8.2 for 14Apr23 is based on tsunami, see text discussion

#Andreanof Islands, 1996, 7.9, 1957, 8.6, no catalogue observations for Russia

\*\*Ms from Zayakin & Luchinina

Table S2. Epicentral locations, centroids and moment magnitudes for the 5 December 1997 Kronotsky earthquake (ISC\* Event 1056468 "Near east coast of Kamchatka Peninsula")

| Origin of analysis                                   | ISC*origin ID    | Lat °N             | Long °E             | Moment/Mw                    | Additional information                        |
|------------------------------------------------------|------------------|--------------------|---------------------|------------------------------|-----------------------------------------------|
| <b>Epicenter/Mainshock<sup>^</sup></b>               |                  |                    |                     |                              |                                               |
| KEMSD GS RAS                                         |                  | 54.95              | 163.23              |                              | Gusev et al. 1998, Luneva&Lee 2003            |
| Zobin& Levina 2001; Slavina et al. 2007              |                  | 54.64              | 162.58              |                              | Kamchatka network catalogue; S&a1 162.55      |
| KRSC reported in ISC database                        | 2296136          | 54.64              | 162.55              |                              | ISC KRSC = KEMSD                              |
| ISC-International Seismological Centre               | 1056468          | 54.8043            | 162.0069            |                              | accessed online 13 Mar 2017                   |
| Engdahl and Villsenor 2002                           | 2329842          | 54.797             | 162.003             |                              | ISC-CENT--Centennial Catalogue                |
| EHB — reported in ISC online                         | 9258772          | 54.792             | 162.001             |                              | ISC — Engdahl, vonderHilst & Buland, 1998     |
| NAO — reported in ISC online                         | 2296140          | 55                 | 162                 |                              | ISC — NORSAR, Norway                          |
| EIDC — Arlington, VA                                 | 2296135          | 54.8523            | 161.9921            |                              | ISC—Experim. (GSETT3) Internatl Data Ctr      |
| BJI — China                                          | 2296137          | 54.82              | 161.90              |                              | ISC — China Earthquake Administration         |
| <b>Centroid/Moment Tensor solutions &amp; models</b> |                  |                    |                     |                              |                                               |
| Geophys Survey Russian Academy Sci.                  | 2296139          | 54.881             | 161.947             | 2.2x10 <sup>20</sup> Nm      | ISC — MOS, Obninsk                            |
| NEIC, Golden, CO [USGS]                              | 2296138, 5159529 | 54.841             | 162.035             | 4.1x10 <sup>20</sup> Nm      | ISC; National Earthquake Information Center   |
| Global CMT [formerly Harvard]                        | 2296141          | 54.31              | 161.91              | 7.8                          | ISC - HRVD, Global GMT #120597C               |
| Harvard CMT early                                    |                  | 54.08              | 162.29              | 7.9                          | reported in Gusev et al., 1998                |
| Sohn, 1998                                           |                  | 54.8               | 162                 | uses 2.5x10 <sup>20</sup> Nm | model from tsunami analysis; location approx. |
| Burgmann et al. 2001                                 |                  | 54.19 <sup>#</sup> | 162.57 <sup>#</sup> | uses 3.8x10 <sup>20</sup> Nm | acos model based on GPS data                  |
| Burgmann et al. 2001                                 |                  | 54.23 <sup>#</sup> | 162.33 <sup>#</sup> | uses 4.1x10 <sup>20</sup> Nm | bcos model based on GPS data                  |

\*ISC = International Seismological Centre, *On-line Bulletin*, <http://www.isc.ac.uk>, Internatl. Seismol. Cent., Thatcham, United Kingdom, 2014; last accessed 20 March 2017

<sup>^</sup>Ordered by longitude, easternmost to westernmost

<sup>#</sup>Latitude and longitude refer to the center of the upper dislocation edge of the modeled centroid

Table S3: Historical tsunamigenic events in the Kuril-Kamchatka region and their record in Hilo, Hawaii

| Date (young to old) |    |     | Location epicenter/rupture |                   | Earthquake |                 | Tsunami runup/tide |                   |                    | COMMENTS                                                       |
|---------------------|----|-----|----------------------------|-------------------|------------|-----------------|--------------------|-------------------|--------------------|----------------------------------------------------------------|
| Year                | Mo | Day | Latitude<br>°N             | Region            | M<br>NCEI  | Mw <sup>^</sup> | Runup<br>max<br>m  | Hilo<br>tide<br>m | Hilo<br>runup<br>m |                                                                |
| 2009                | 1  | 15  | 46.857                     | Central Kuril Is. | 7.4        | ~               | *                  | 0                 |                    | 0.11 m tide gage<br>Severo Kurilsk                             |
| 2007                | 1  | 13  | 46.243                     | Central Kuril Is. | 8          | ~               | 6-20**             | 0.11              |                    | outer rise event                                               |
| 2006                | 11 | 15  | 46.592                     | Central Kuril Is. | 8.3        | ~               | 6-20**             | 0.475             |                    |                                                                |
| 1997                | 12 | 5   | 54.88                      | Kamchatka         | 7.8        | 7.9             | (9)                | 0.24              |                    | (runup max from<br>deposits)                                   |
| 1995                | 12 | 3   | 44.663                     | S. Kuril Is.      | 7.9        | ~               | *                  | 0.228             |                    |                                                                |
| 1994                | 10 | 4   | 43.773                     | Shikotan Is.      | 8.3        | ~               | 10.4               | 0.16              |                    | outer rise event                                               |
| 1993                | 6  | 8   | 51.25                      | S. Kamchatka      | 7.5        | 7.5             | *                  | 0.06              |                    |                                                                |
| 1971                | 12 | 15  | 55.91                      | N. Kamchatka      | 7.8        | 7.8             | (13)               | 0.1               |                    | 0.47 on Ust' Kamch.<br>tide gage; (runup max<br>from deposits) |
| 1969                | 11 | 22  | 57.8                       | N. Kamchatka      | 7.7        | 7.7             | 15                 | 0.1               |                    |                                                                |
| 1963                | 10 | 13  | 44.81                      | S. Kuril Is.      | 8.5        | ~               | 4.5                | 0.4               |                    |                                                                |
| 1963                | 10 | 20  | 44.1                       | S. Kuril Is.      | 6.7        | ~               | 15                 | 0.1               |                    |                                                                |
| 1959                | 5  | 4   | 53.9                       | Kamchatka         | 8.2        | 8               | 1.5-2              | 0.1 <sup>#</sup>  |                    |                                                                |
| 1958                | 11 | 6   | 44.53                      | S. Kuril Is.      | 8.3        | ~               | 5                  | 0.2               |                    | limited nearfield obs, 5<br>m on Shikotan                      |
| 1958                | 11 | 12  | 44.2                       | S. Kuril Is.      | 7          | ~               | 1                  | 0.1               |                    |                                                                |
| 1952                | 11 | 4   | 52.3                       | Kamchatka-Kuril   | 9          | 9               | (20)               | 1.1               | 3.4                | (runup max from<br>deposits)                                   |
| 1933                | 1  | 8   | 49.12                      | N. Kuril Is.      | na         | na              | 9                  | 0                 |                    | Kharimkotan landslide                                          |
| 1927                | 12 | 28  | 53.8                       | Kamchatka         | 7.3        | 7.5             | *                  | 0.1               |                    |                                                                |
| 1923                | 4  | 13  | 55.4                       | N. Kamchatka      | 7.3        | 8.2             | 14                 | 0.3               |                    |                                                                |
| 1923                | 2  | 2   | 52.5                       | Kamchatka         | 8.3        | 8.5             | 8                  |                   | 6.1                |                                                                |
| 1918                | 9  | 7   | 45.5                       | S. Kuril Is.      | 8.2        | ~               | 12                 |                   | 1.5                |                                                                |
| 1917                | 1  | 30  | 55.2                       | N. Kamchatka      |            | 8               | *                  |                   |                    | no tsunami; strike-slip<br>event, Steller f.z.                 |
| 1841                | 5  | 17  | 52.5                       | Kamchatka         | 8.4        | 9               | 15                 |                   | 4.6                |                                                                |
| 1737                | 10 | 17  | 50.5                       | S. Kamchatka      |            | 9.2             | 30?                |                   |                    |                                                                |
| 1737                | 11 | 4   | 55.5                       | N. Kamchatka      |            | 7.8             | *                  |                   |                    |                                                                |

Primary sources: Zayakin and Luchinina, 1987; NCEI Tsunami database

\*no nearfield data

<sup>^</sup>from Gusev & Shumilina, 2004

<sup>#</sup>1959 measurement is from Honolulu

\*\*2006 and 2007 runup could not be definitely distinguished in post-tsunami survey

Table S4. Comparison of measurements and observations, 1923 Kamchatka tsunamis

| Observation locality                            | Latitude | Longitude | 3 Feb 1923                          |              | 13 April 1923                       |      |
|-------------------------------------------------|----------|-----------|-------------------------------------|--------------|-------------------------------------|------|
|                                                 |          |           | Runup (m)                           | type         | Runup (m)                           | type |
| Bering Island, Commander Islands                | 55.20    | 166.01    |                                     |              | 4                                   | 1    |
| <u>Kamchatka Pacific coast, north to south</u>  |          |           |                                     |              |                                     |      |
| Dembi Spit area, east Ust Kamchatsk             | 56.22    | 162.52    |                                     |              | 11                                  | 1    |
| Kamchatka River                                 | 56.25    | 162.44    |                                     |              | broke ice 7<br>km upriver           | 1    |
| Tsutsumi fish plant                             | 55.176   | 162.313   | damaged<br>cabin on first<br>ridge* | 1            | 4 km<br>inundation**<br>ext. damage | 1    |
| First River, north central Kamch Bay            | 56.05    | 162.05    |                                     |              | 20                                  | 1    |
| Chazhma River, south Kamch Bay                  | 55.06    | 161.82    | 4-5 km<br>upriver                   | 1            |                                     |      |
| Semyachik, central Kronotsky Bay                | 54.12    | 159.98    | 6                                   | 1            |                                     |      |
| Kolygir Bay, Shipunsky Peninsula                | 53.42    | 159.85    | 8                                   | 1            |                                     |      |
| Ostrovnoye, north Avachinsky Bay                | 53.25    | 159.57    | obs                                 | 1            |                                     |      |
| Nalychevo R. north Avachinsky Bay               | 53.16    | 159.24    | obs                                 | 1            |                                     |      |
| Khalaktirka, central Avachinsky Bay             | 52.98    | 158.83    | 8.4 <sup>^</sup>                    | <sup>^</sup> |                                     |      |
| Avachinsky Gulf (interior)                      | 52.97    | 158.50    | obs                                 | 1            |                                     |      |
| <u>Japan Pacific coast, north to south</u>      |          |           |                                     |              |                                     |      |
| Hanasaki, Hokkaido                              | 43.278   | 145.568   | 0.23                                | 2            | 0.07                                | 2    |
| Ayukawa, Miyagi, Japan                          | 38.300   | 141.500   | 0.33                                | 2            | 0.17                                | 2    |
| Kushimoto, Wakayama, Japan                      | 33.467   | 135.783   | 0.5                                 | 2            |                                     |      |
| Hososhima, Miyazaki, Japan                      | 32.433   | 131.667   | 0.2                                 | 2            |                                     |      |
| <u>Pacific islands</u>                          |          |           |                                     |              |                                     |      |
| Hilo, Hawaii, HI, USA                           | 19.733   | -155.067  | 6.1                                 | 1            | 0.3                                 | 2    |
| Kahului, Maui, HI, USA                          | 20.895   | -156.477  | 3.5                                 | 1            |                                     |      |
| Honolulu, Oahu, HI, USA                         | 21.307   | -157.867  | 0.9                                 | 2            | 0.2                                 | 2    |
| Haleiva, Oahu, HI, USA                          | 21.593   | -158.106  | 3.7                                 | 1            |                                     |      |
| Apia, Upolu Is, Samoa                           | -13.827  | -171.761  | obs                                 | 2            |                                     |      |
| <u>West coast North America. north to south</u> |          |           |                                     |              |                                     |      |
| Tofino, BC, Canada                              | 49.153   | -125.913  | 0.14                                | 2            | 0.08                                | 2    |
| San Francisco, CA, USA                          | 37.807   | -122.465  | 0.1                                 | 2            | 0.15                                | 2    |
| Santa Cruz, CA, USA                             | 36.970   | -122.020  | obs                                 | 1            |                                     |      |
| Los Angeles, CA, USA                            | 33.717   | -118.267  | obs                                 | 1            |                                     |      |
| San Diego, CA, USA                              | 32.715   | -117.174  | 0.2                                 | 2            | 0.1                                 | 2    |

Primary source: for Kamchatka: Zayakin and Luchinina; remainder: NCEI catalogue

Type: 1 = runup, elevation above sea level; 2 = tide gage amplitude

\*first beach ridge ~3.5 m above sea level; second ~4 m asl (profile in Pinegina et al., 2014)

\*\*inundation may have been via river to lagoonal areas between ridges; sediment inundation 1 km (Pinegina et al., 2012)

<sup>^</sup>based on deposits, Pinegina and Bazanova, 2016

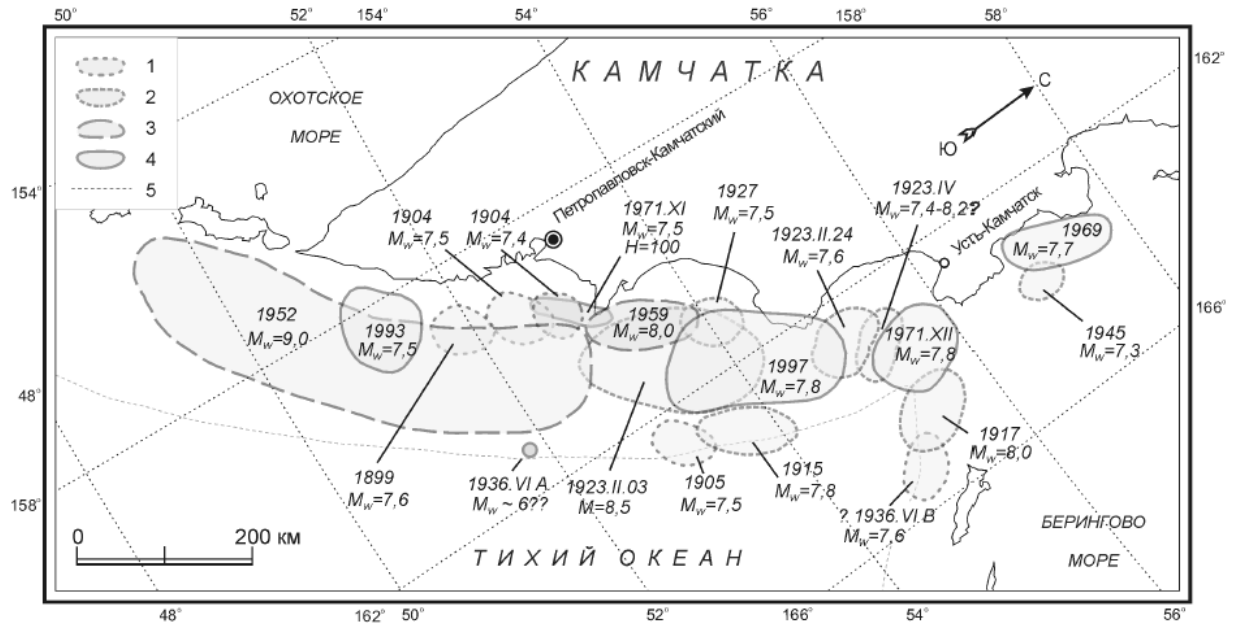

Рис. 1. Новый вариант расположения очаговых зон землетрясений Камчатки за 1899-2003 гг.

**Figure S1.** Original figure from which we make comments and suggested revisions in the text (Gusev, 2004; used with permission) Translated caption: “New version (of) source location zones of Kamchatka earthquakes 1899 to 2003.” Also see Gusev and Shumilina (2004).

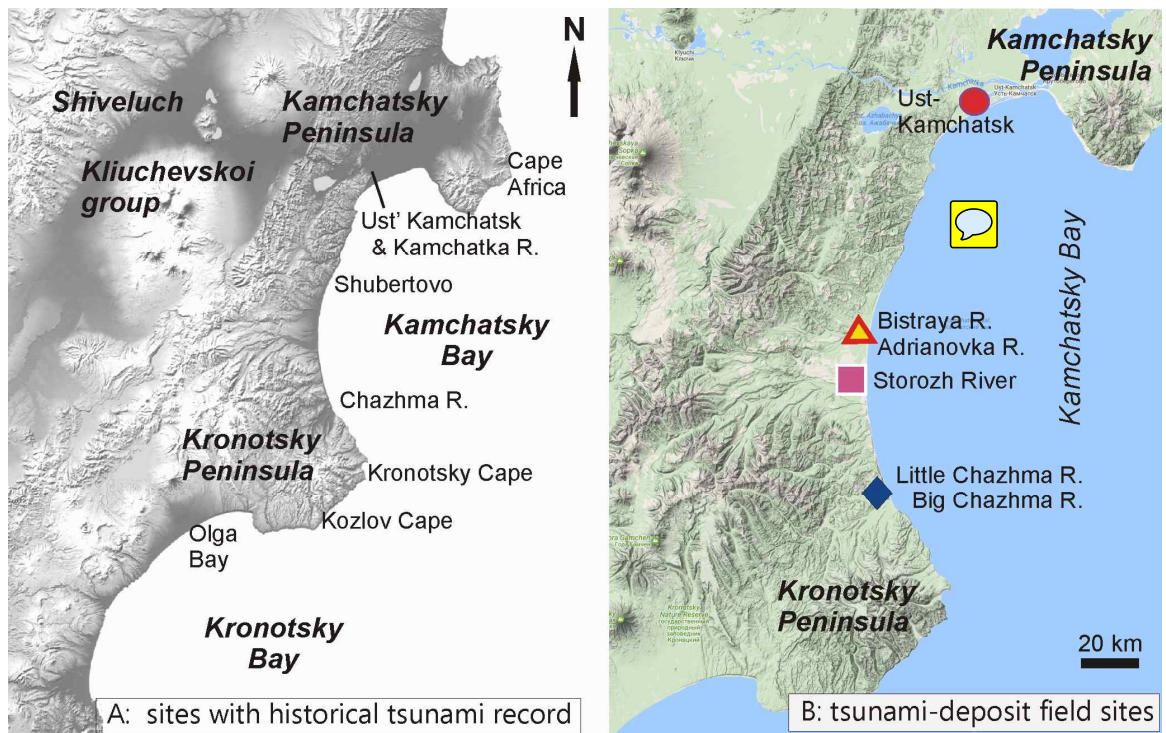

**Figure S2. Left:** sites in the field region with historical tsunami records, shown in Table S1. **Right:** field sites in south Kamchatsky Bay as well as location of Ust Kamchatsk field site (Pinegina et al. 2012; Pinegina, 2014) with data displayed in following figures.

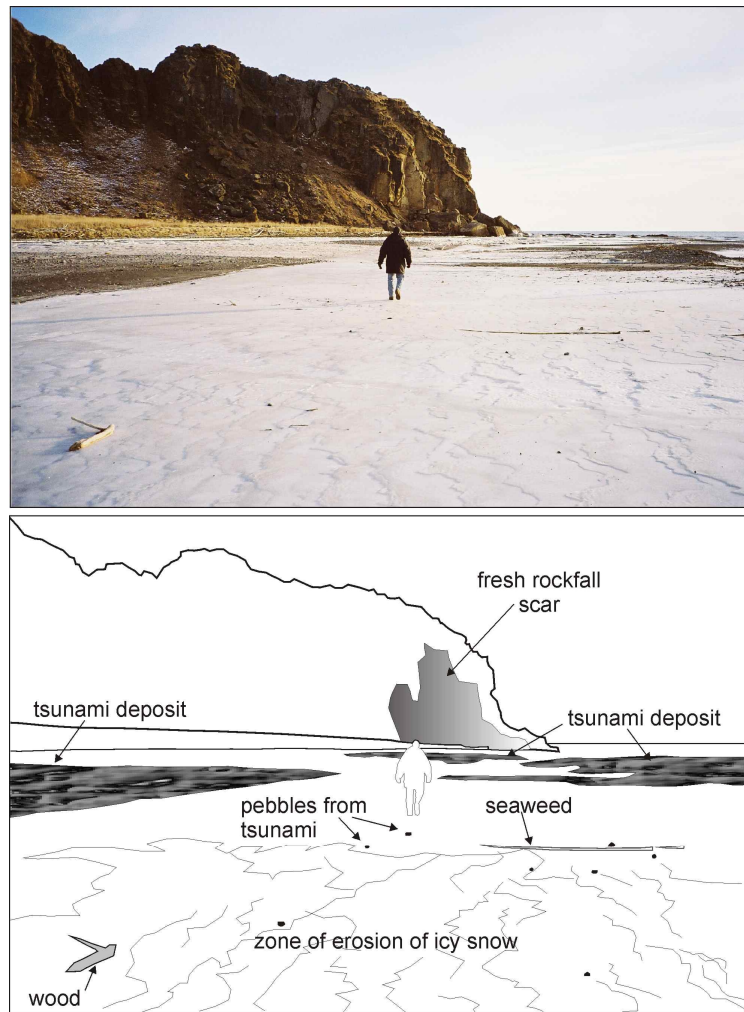

**Figure S3.** View of Kronotsky Cape during 9 December 1997 post-earthquake and post-tsunami survey, with sketch to label features; photo T. Pinegina. Modified from Pinegina et al. (2003).

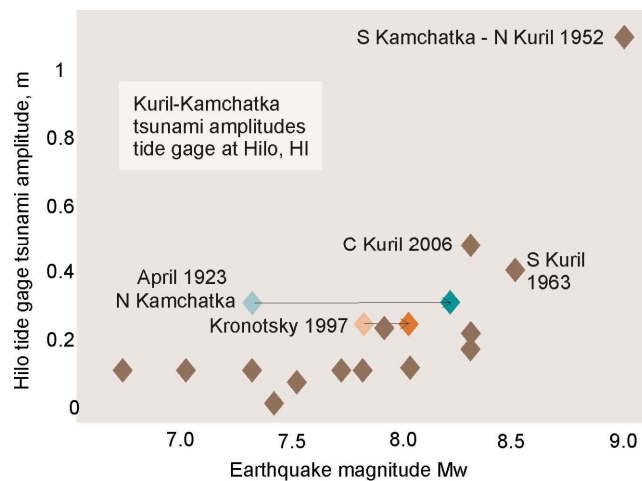

**Figure S4.** Tsunamigenic earthquakes from Kuril-Kamchatka subduction zone and their Hilo tide gage amplitude. Plotted from data in Table S3. April 1923 earthquake is reinterpreted by Gusev and Shumilina (2004) to be a magnitude 8.2 (see Fig. S2), plotted as darker blue. Kronotsky 1997 is plotted in light tan at 7.8 and dark tan as 8.0, which fits the tide-gage trend better, but not so convincingly as the 1923 April revision. “C Kuril” – Central Kuril.

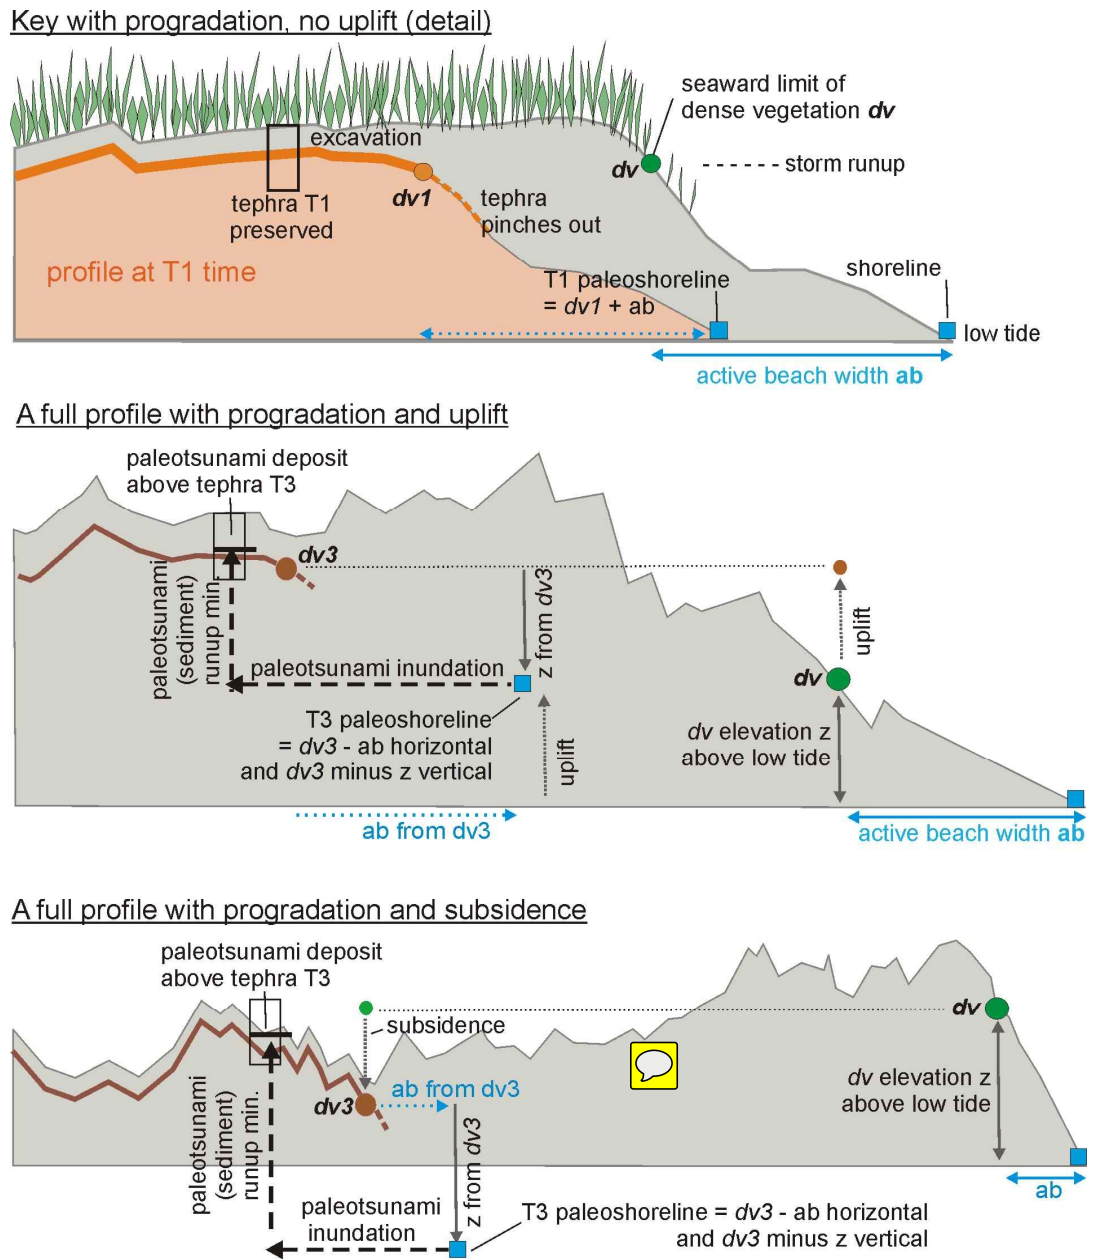

**Figure S5.** Idealized cartoons showing means for reconstructing paleoshorelines on profiles, using preserved tephra (as in Pinegina et al., 2013; MacInnes et al., 2016). The upper diagram is schematic of about 100 m width of shoreline (revised from Pinegina et al., 2013). The middle profile is based on Chazhma 220, about 350 m wide, maximum height about 8 m. The lower profile is from the Storozh 002, about 600 m wide, maximum height about 6 m. While these drawings are based on actual profiles, the illustrations are schematic and the tephra are not actual examples. Shorelines and their paleo-equivalents are shown as blue boxes in these 2-D views. The other primary reference point  $dv$  is the elevation above low tide of the first dense vegetation. The upper detail shows that it is near  $dv$  that tephra are preserved shoreward and not preserved seaward. From  $dv$  on any profile, we can measure down to low tide (vertical distance  $z$ ) and seaward to the shoreline (horizontal distance  $ab$ ). To reconstruct a paleoshoreline, we find a paleo  $dv$  and apply the modern metrics of elevation and distance from the shoreline to place a paleoshoreline point, from which we can use a tsunami deposits to estimate paleotsunami (sediment) inundation and runup. These shoreline reconstructions are made for each tephra interval, that is, we locate where a tephra such as tephra 3 pinches out, and all tsunami deposits above that tephra but below the overlying one are treated with the same approximation of paleoshoreline location.

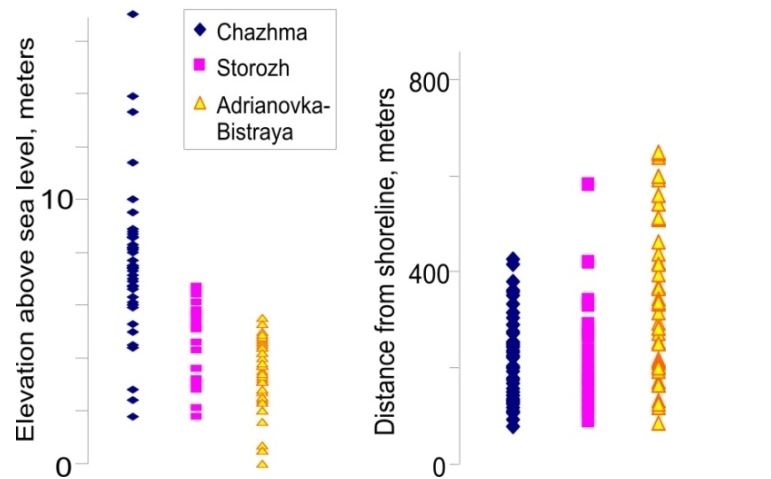

**Figure S6.** Distribution of elevations (meters above sea level) and distances (meters from modern shoreline) of excavations in the field area, southern Kamchatsky Bay, as originally compiled by Pinegina (2014). We use these distances and elevations for reconstructing tsunami sediment runup and inundation for 20<sup>th</sup> century tsunami deposits (Fig. S7). Note that the Chazhma area has higher elevations and narrower beach plains, and that the average elevations decrease northward (Chazhma to Bistraya), while the average beach plain width increases. In all, for example, there is only one excavation higher than 16 m, and only four excavations higher than 10 m. There are no excavations farther from the modern shoreline than about 600 m. Locations with symbols in Fig. S2.

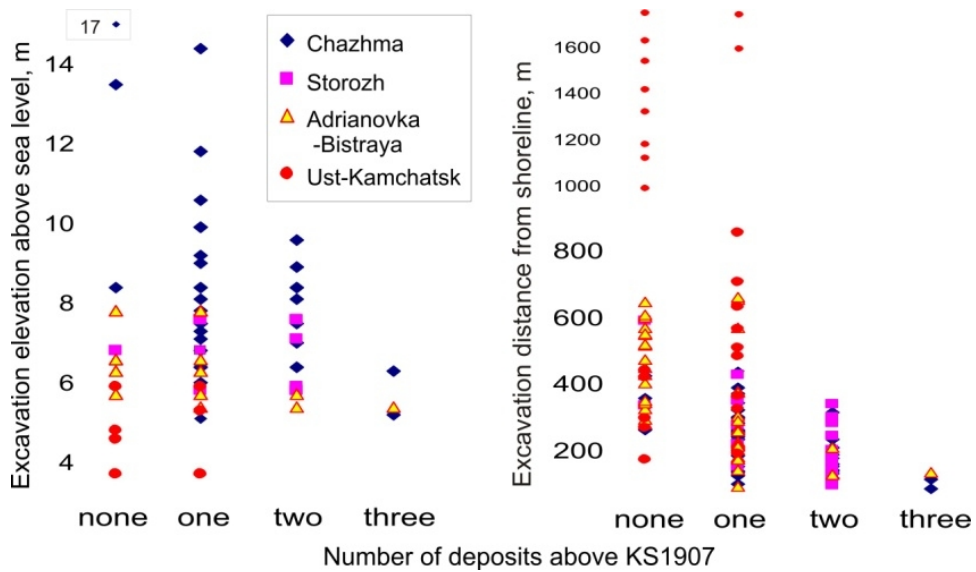

**Figure S7.** Elevation and distance of tsunami deposits above KS<sub>1907</sub>, including data from the Ust' Kamchatsk area, north Kamchatsky Bay (Pinegina et al., 2012; Pinegina, 2014). In cases where there is only one deposit, it is the one not far stratigraphically above KS<sub>1907</sub>, and thus which we interpret to have been deposited in 1923. This deposit reaches greater elevations and distances inland, being the largest 20<sup>th</sup> century tsunami in this bay. In cases where there are two deposits, the one in addition was at the surface in A.D. 2000 summer and is interpreted to be from the December 1997 Kronotsky tsunami. In a few excavations, there is a third, thin deposit between the other two, which we interpret to have been deposited by Chile 1960 tsunami (see Table S1). Locations with symbols in Figure S2.



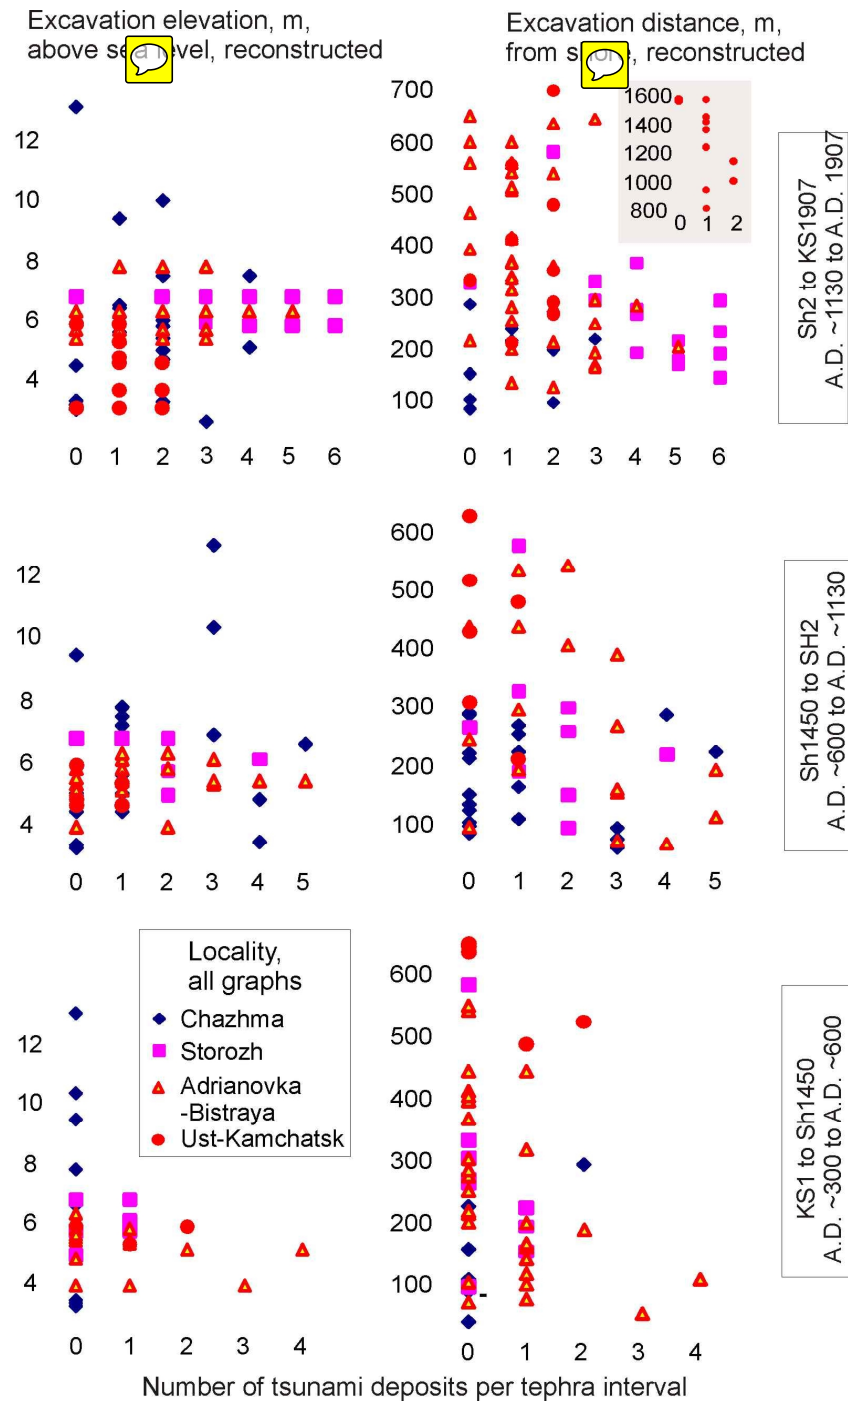

**Figure S8.** Number of paleotsunami deposits per tephra interval for three intervals below  $KS_{1907}$  (for 20<sup>th</sup> century, see Fig, S7), including data from north Kamchatsky Bay near Ust-Kamchatsk (Pinegina et al., 2012; Pinegina, 2014). For each interval, the elevation and distance from shoreline of each excavation is reconstructed using methods as in Fig, S5. Locations with symbols in Fig. S2.

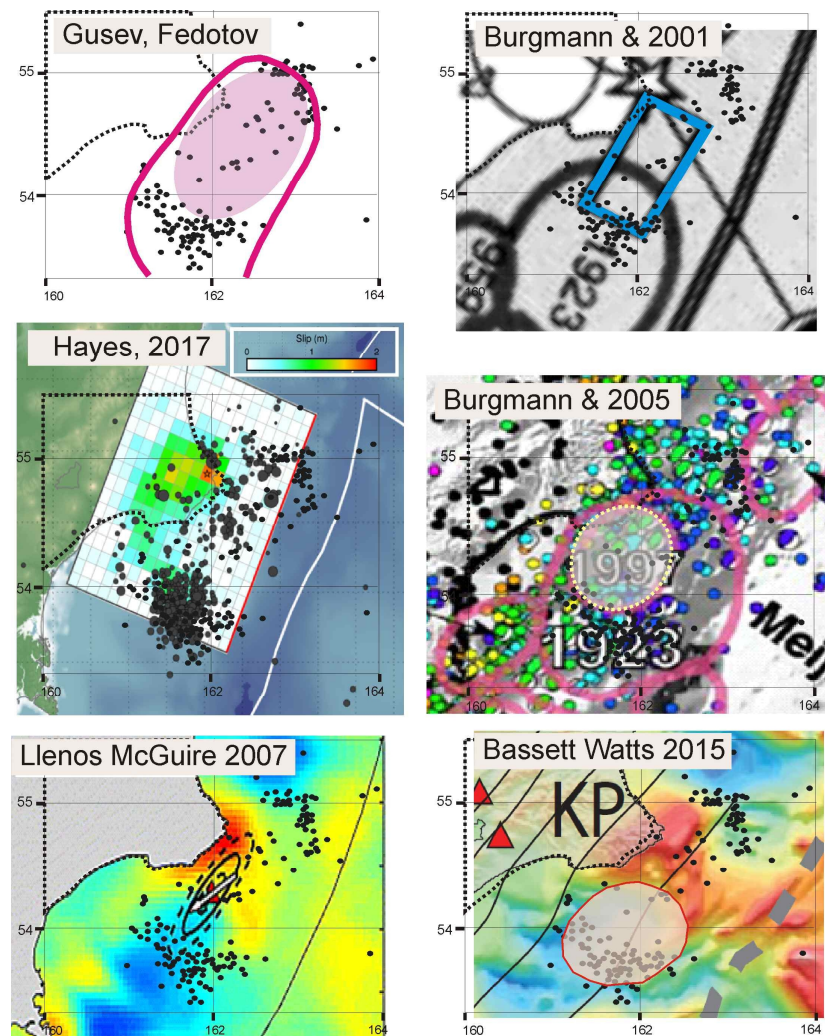

**Figure S9.** Rough comparison of rupture locations of the 5 December 1997 earthquake, all using the same base map with plotted aftershocks (traced from Gusev et al., 1998). Maps are scaled to the latitude and longitude of that base map (upper left) or fitted to the peninsula outline; because different map projections are used, this comparison is rough; maps are lined up vertically and horizontally. Not all symbols and scales are shown, only ones important to earthquake location and nature.

From upper left, counter-clockwise: **Gusev, Fedotov**: Gusev (2004) (Fig. S1) chose to outline the entire aftershock area as a rupture zone for the earthquake (dark pink outline), whereas Fedotov et al. (1998) did not draw an outline but interpreted that the earthquake filled a gap between the February and April 1923 events, which is approximated by the transparent pink ellipse. **Bürgmann et al. 2001**: Based on their dislocation model *Bcos* based on GPS measurements; rectangle is surface projection of the model fault. **Bürgmann et al. 2005**: [background is instrumentally recorded seismicity]; original figure caption states: “Bold red outlines labeled with year are the rupture zones of large historic earthquakes determined from aftershock distributions [Johnson and Satake, 1999]”; however, that 1999 reference does not mention or plot the 1997 Kronotsky earthquake, and the rupture zones are from Fedotov et al. 1982, from which Johnson and Satake omit the April 1923 event and misplot 1917 (to the north of this map zone). **Bassett and Watts 2015**: Ellipse (superimposed trace) is identified as “Coseismic slip/aftershock zone...” of the 1997 Kronotsky earthquake “modified from Bürgmann et al [2005]” Background is residual bathymetry, the positive features associated with the Emperor Seamount chain impinging on Kronotsky Peninsula (KP). **Llenos and McGuire 2007**: Characteristic rupture ellipses for the 1997 Kronotsky earthquake with major axes of length 0.5  $L_c$  (inner dashed ellipse), 1  $L_c$  (solid black ellipse) and 1.5  $L_c$  (outer dashed ellipse) ( $L_c$  is characteristic rupture length) plotted on a TPGA (trench-parallel gravity anomaly) map; rupture directivity (arrow), centroid location (triangle); thin black line is trench axis. **Hayes 2017** (also see <https://earthquake.usgs.gov/earthquakes/eventpage/usp0008btk#finite-fault>): from finite fault modeling: Surface projection of modeled 1997 slip distribution superimposed on GEBCO bathymetry; modeling used a hypocenter matching or adjusted slightly from the initial NEIC solution (Lon. = 162.0 deg.; Lat. = 54.8 deg., Dep. = 34.0 km), and a fault plane defined using either the rapid W-Phase moment tensor (for near-real time solutions), or the gCMT moment tensor (for historic solutions). White line: plate boundary, gray circles are aftershock locations (up to 7 days), sized by magnitude.

### References for supplementary material

- Bassett, D. and Watts, A. B.: Gravity anomalies, crustal structure, and seismicity at subduction zones: 1. Seafloor roughness and subducting relief, *Geochemistry, Geophysics, Geosystems*, 16, 1508-1540, doi/10.1002/2014GC005684, 2015.
- Bürgmann, R., Kogan, M.G., Levin, V.E., Scholz, C.H., King, R.W. and Steblov, G.M.: Rapid aseismic moment release following the 5 December, 1997 Kronotsky, Kamchatka, earthquake, *Geophys. Res. Lett.*, 28, 1331-1334, doi: 10.1029/2000GL012350, 2001.
- Bürgmann, R., Kogan, M.G., Steblov, G.M., Hilley, G., Levin, V.E. and Apel, E.: Interseismic coupling and asperity distribution along the Kamchatka subduction zone, *J. Geophys. Res.*, 110, B07405, doi/10.1029/2005JB003648, 2005.
- Engdahl, E. R., Villasenor, A.: Global seismicity: 1900-1999: in W.H.K. Lee, H. Kanamori, P.C. Jennings and C. Kisslinger, eds., *International Handbook of Earthquake and Engineering Seismology, Part A, Ch. 41*, 2002, 665-690. Academic Press. Accessed online Feb 2010.  
<http://earthquake.usgs.gov/research/data/centennial.php>
- Fedotov, S.A., Chernyshev, S.D., Matviyenko, Y.D., and Zharinov, N.A.: Prediction of Kronotskoye earthquake of December 5, 1997,  $M = 7.8-7.9$ , Kamchatka, and its strong aftershocks with  $M > \text{or} = 6$ , *Volcanology and Seismology*, 6, 3-16, 1998, [in Russian].
- Gusev, A. A.: The schematic map of the source zones of large Kamchatka earthquakes of the instrumental epoch: in *Complex seismological and geophysical researches of Kamchatka. To 25th Anniversary of Kamchatkan Experimental & Methodical Seismological Department* Ed. by E.I. Gordeev, V.N. Chebrov. Petropavlovsk-Kamchatsky, 445 pp., 2004 [in Russian].
- Gusev, A. A., Levina, V. I., Saltykov, V. A., Gordeev, E. I.: Large Kronotskoye earthquake of Dec. 5, 1997: basic data, seismicity of the epicentral zone, source mechanism, macroseismic effects: in Gordeev et al., eds., 32-54, 1998 [In Russian with English abstract and figure captions].
- Gusev, A. A., Shumilina, L. S.: Recurrence of Kamchatka strong earthquakes on a scale of moment magnitudes: *Izvestiya, Physics of the Solid Earth*, 40, 206-215, 2004.
- Hayes, Gavin P.: The finite, kinematic rupture properties of great-sized earthquakes since 1990, *Earth and Planetary Science Letters*, 468, 94-100, doi: <https://doi.org/10.1016/j.epsl.2017.04.003>, 2017.
- Llenos, A. L., and McGuire, J. J.: Influence of fore arc structure on the extent of great subduction zone earthquakes, *Journal of Geophysical Research: Solid Earth*, 112, B09301, doi:10.1029/2007JB004944, 2007.
- Luneva, M. N., Lee, J. M.: Shear wave splitting beneath South Kamchatka during the 3-year period associated with the 1997 Kronotsky earthquake, *Tectonophysics*, 374, 135-161, doi:10.1134/S1819714016040059, 2003.
- NCEI, National Centers for Environmental Information (formerly NGDC), Natural Hazards Data, Images and Education, Tsunami and Earthquake databases: <https://www.ngdc.noaa.gov/hazard/hazards.shtml>
- MacInnes, B., Kravchunovskaya, E., Pinegina, T., Bourgeois, J.: Paleotsunamis from the central Kuril Islands segment of the Japan-Kuril-Kamchatka subduction zone, *Quaternary Research*, 86, 54–66, <https://doi.org/10.1016/j.yqres.2016.03.005>, 2016.
- Pinegina T. K.: Time-space distribution of tsunamigenic earthquakes along the Pacific and Bering coasts of Kamchatka: insight from paleotsunami deposits, Doctor of Geological Science dissertation, Institute of Oceanology RAS, Moscow, 235 pp., 2014 [in Russian].
- Pinegina, T. K., Bazanova, L. I.: New data on characteristics of historical tsunamis on the coast of Avacha Bay (Kamchatka), *Bulletin of Kamchatka regional association "Educational-scientific center". Earth sciences*, 3, 5-17, 2016 [in Russian with English abstract].
- Pinegina, T.K., Bourgeois, J., Bazanova, L.I., Melekestsev, I.V., and Braitseva, O.A.: A millennial-scale record of Holocene tsunamis on the Kronotsky Bay coast, Kamchatka, Russia, *Quaternary Res.*, 59, 36-47, DOI: [https://doi.org/10.1016/S0033-5894\(02\)00009-1](https://doi.org/10.1016/S0033-5894(02)00009-1), 2003
- Pinegina, T.,K., Bourgeois, J., Kravchunovskaya, E. A., Lander, A.V., Arcos, M. E., Pedoja, K. and MacInnes B.T.: A nexus of plate interaction: Vertical deformation of Holocene wave-built terraces on the Kamchatsky Peninsula (Kamchatka, Russia), *Geological Society of America Bulletin* , 125, 1554-1568, doi: 10.1130/B30793.1, 2013.

- Pinegina, T. K., Kozhurin, A. I., Ponomareva, V. V.: Seismic and tsunami hazard assessment for Ust-Kamchatsk settlement, Kamchatka, based on paleoseismological data, Bulletin of Kamchatka regional association "Educational-scientific center". Earth sciences. 1, 138-159, 2012 [in Russian with English abstract].
- Pinegina, T. K., Kozhurin, A. I., Ponomareva, V. V.: Active Tectonics and Geomorphology of the Kamchatsky Bay Coast in Kamchatka, Russian Journal of Pacific Geology, 8, 65–76, 10.1134/S1819714014010047, 2014.
- Slavina, L. B., Pivovarova, N. B., Levina, V. I.: A study in the velocity structure of December 5, 1997, Mw = 7.8 Kronotskii rupture zone, Kamchatka, J. Volcanology & Seismology, 1, 254-262, doi:10.1134/S0742046307040045, 2007.
- Sohn, S.W.: The 1997 Kamchatka earthquake. Individual Studies by Participants at the International Institute of Seismology and Earthquake Engineering, 34, 91-99, 1998. PB: International Institute of Seismology and Earthquake Engineering.
- Zayakin, Yu. A., Luchinina, A.A.: Catalogue tsunamis on Kamchatka, Obninsk: VNIIGMI-MTSD, 51pp., 1987 [Booklet in Russian].
- Zobin, V. M., Levina, V. I.: The rupture process of the Mw 7.8 Cape Kronotsky, Kamchatka, earthquake of 5 December 1997 and its relationship to foreshocks and aftershocks, Bull. Seis. Soc. Am., 91, 1619-1628, doi: 10.1785/0119990116, 2001.
